# Supplementary material for: One-Pot Synthesis and Evaluation of Antioxidative Stress and Anticancer Properties of an Active Chromone Derivative
Source: MDPI journal article supplement (doi:10.3390/molecules28073129), 2023-03-31
Supplement: s1 [file s1]

# One-Pot Synthesis and Evaluation of Antioxidative Stress and Anticancer Properties of an Active Chromone Derivative

Chirattikan Maicheen<sup>1</sup>, Chokchaloemwat Churnthammakarn<sup>2</sup>, Nichapat Pongsroypech<sup>2</sup>, Thitiphong Khamkhenshorngphanuch<sup>2,3</sup>, Jiraporn Ungwitayatorn<sup>4</sup>, Kanin Rangsangthong<sup>2</sup>, Rathapon Asasutjarit<sup>2,3</sup>, Sewan Theeramunkong<sup>\*2,3</sup>

1 Department of Pharmaceutical Chemistry, Faculty of Pharmaceutical Sciences,  
Huachiew Chalermprakiet University, Samut Prakarn 10540, Thailand

2 Faculty of Pharmacy, Thammasat University, Pathumthani, 12120, Thailand

3 Thammasat University Research Unit in Drug, Health Product Development and  
Application (DHP-DA), Department of Pharmaceutical Sciences, Faculty of Pharmacy,  
Thammasat University, Pathumthani, 12120, Thailand.

4 Department of Pharmaceutical Chemistry, Faculty of Pharmacy, Mahidol University,  
Bangkok 10400, Thailand

\*Corresponding author, e-mail: sewan@tu.ac.th

Received [3 March 2023]

## Table of Contents

|                                                        | Page    |
|--------------------------------------------------------|---------|
| 1. General material and method                         | S3      |
| 2. <sup>1</sup> H-NMR spectrum of synthetic compounds  | S4-S15  |
| 3. <sup>13</sup> C-NMR spectrum of synthetic compounds | S16-S27 |
| 4. LCMS spectrum of synthetic compounds                | S28-S32 |

## 1. General Materials and Methods

All reactions, unless otherwise indicated, were carried out in single-neck, round-bottom flasks fitted with a rubber septum and equipped with a magnetic stir bar. Air or water-sensitive solvents were transferred via a syringe. When required, solvents were degassed by bubbling nitrogen through a needle. A rotary evaporator concentrated the resulting organic layers at 45-70 °C under reduced pressure. The progress of the reaction was monitored with thin-layer chromatography (TLC) using a silica gel 60 F254 aluminum sheet. Visualization was performed with a 254 / 365 nm UV light source (Camag, Switzerland), generally followed by immersion in potassium permanganate (KMnO<sub>4</sub>) or iodine vapor, as appropriate. Upon completion of the reaction, the crude products were prepared with a suitable procedure and finally dried and purified by column chromatography to provide a pure product.

The FTIR spectrum of the compounds was obtained by the KBr technique using an FTIR spectrometer (IRTracer-100 Shimadzu, Japan). The NMR spectrum was performed using an Ascend TM600/Advance III HD, Bruker, Switzerland. The spectrum of compounds was taken from the 4000 cm<sup>-1</sup> to 650 cm<sup>-1</sup> wave number range. ESI-TOF-MS was performed using a time-of-flight mass spectrometer (micrOTOF-Q-II, BrukerDaltonics, Germany). The ESI system positive-ion mode generated 200-800 m/z. The optimized mass spectrometric conditions included a gas temperature of 350 °C and a drying gas flow rate of 10.0 L/min.

## 2. $^1\text{H}$ -NMR spectrum of synthetic compounds

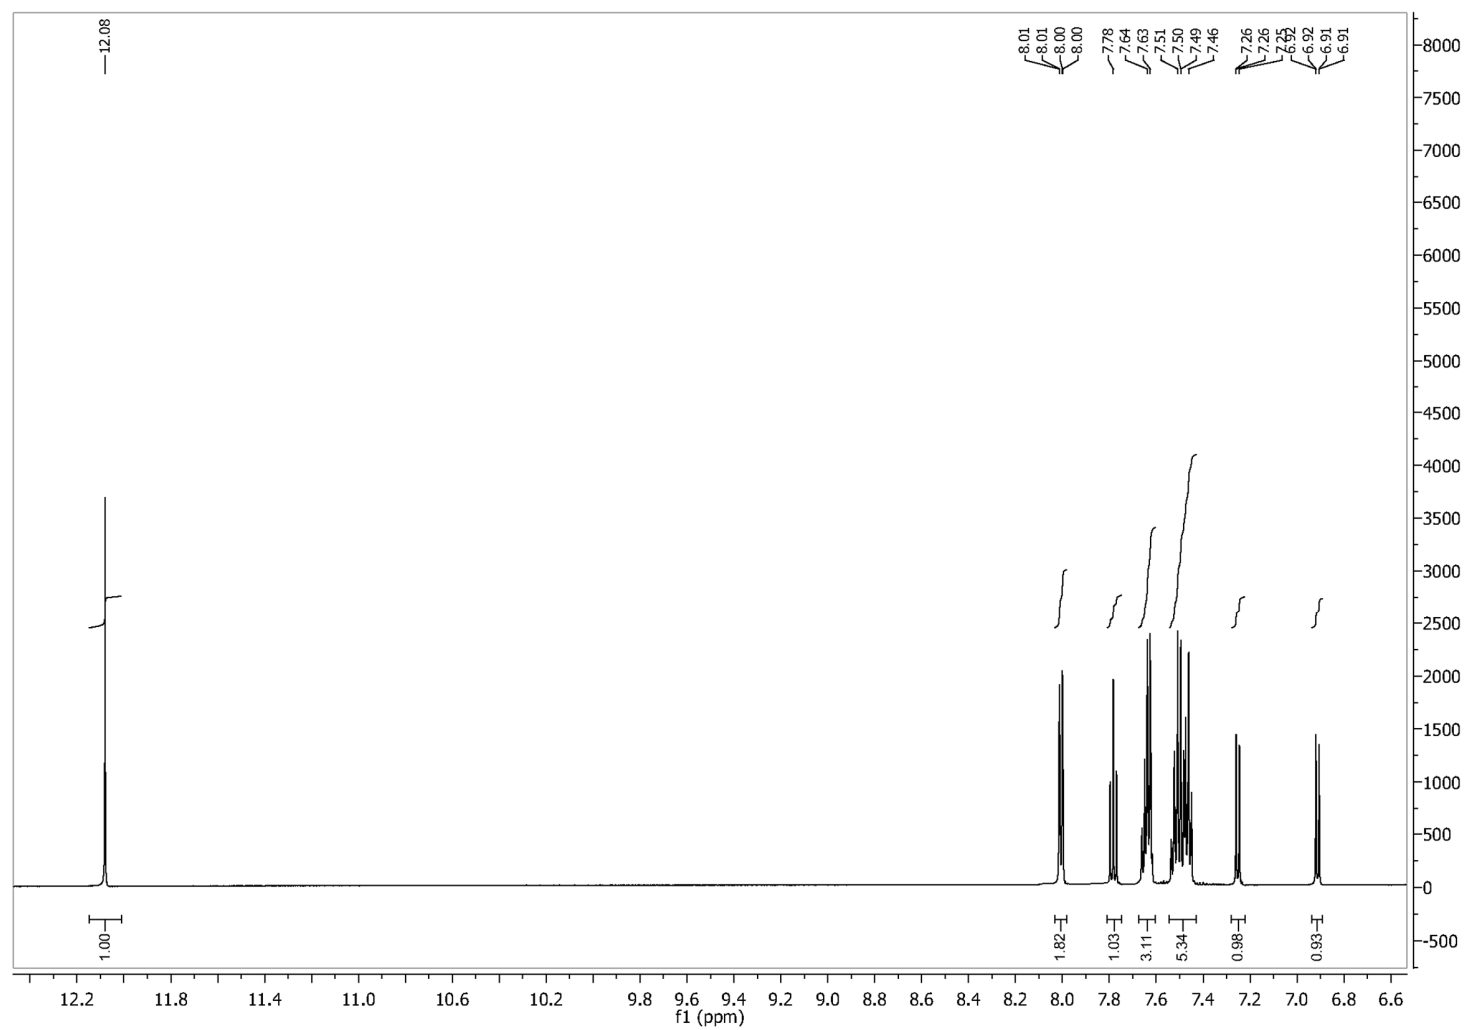

**Figure S1**  $^1\text{H}$ -NMR spectrum of compound 2a

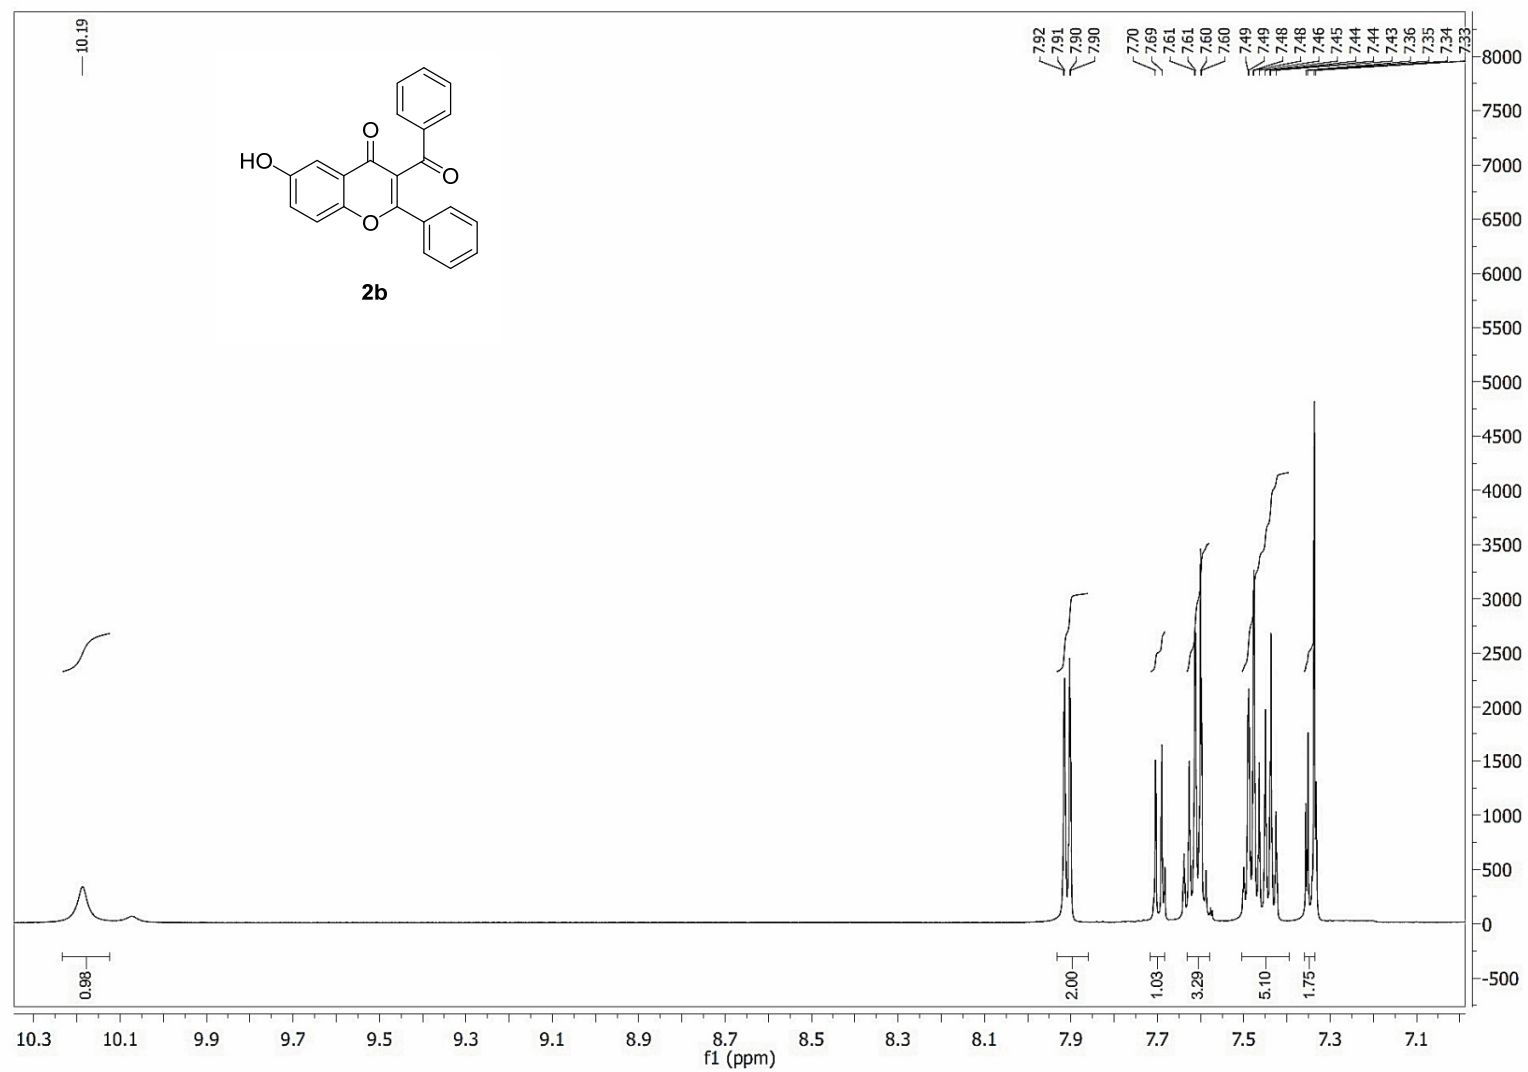

**Figure S2**  $^1\text{H}$ -NMR spectrum of compound **2b**

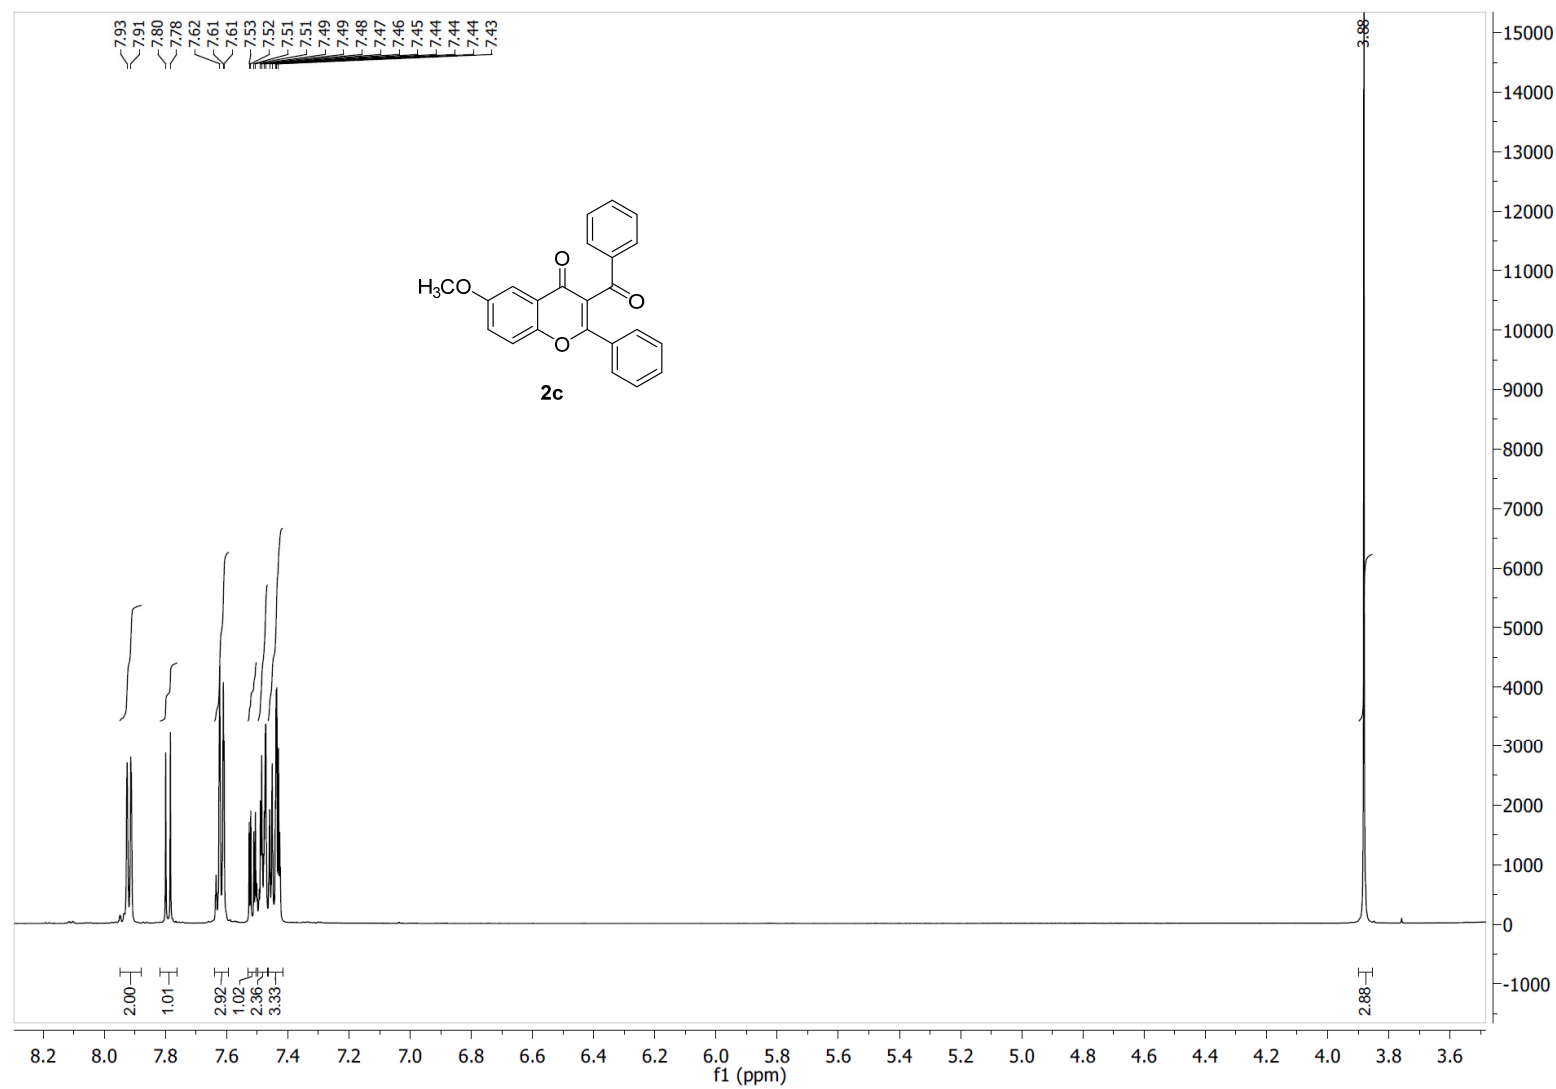

**Figure S3**  $^1\text{H}$ -NMR spectrum of compound **2c**

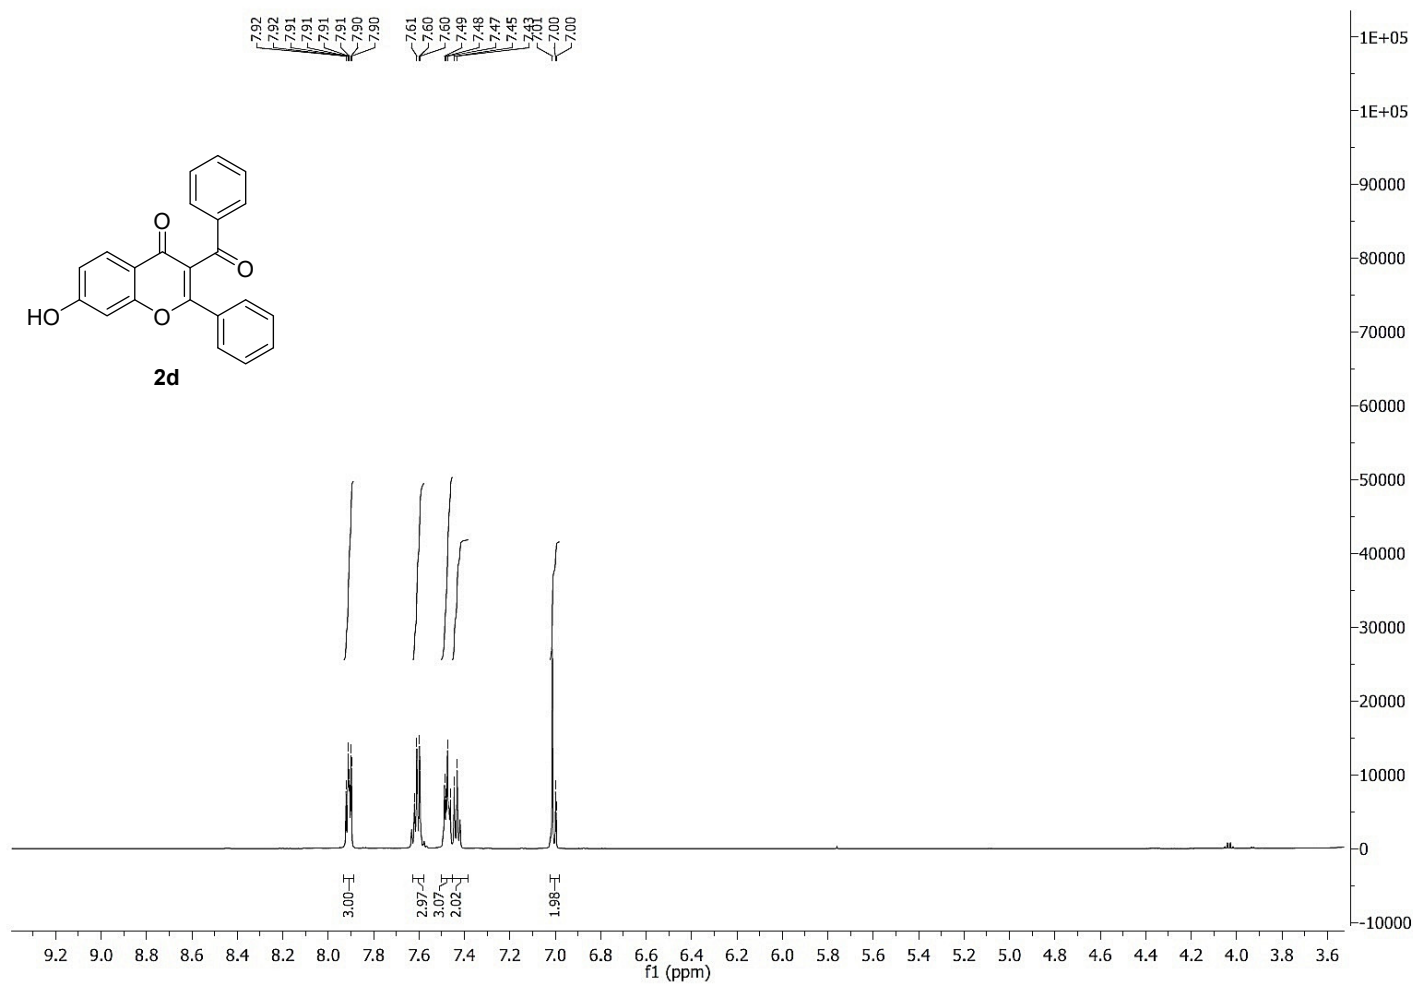

**Figure S4**  $^1\text{H-NMR}$  spectrum of compound **2d**

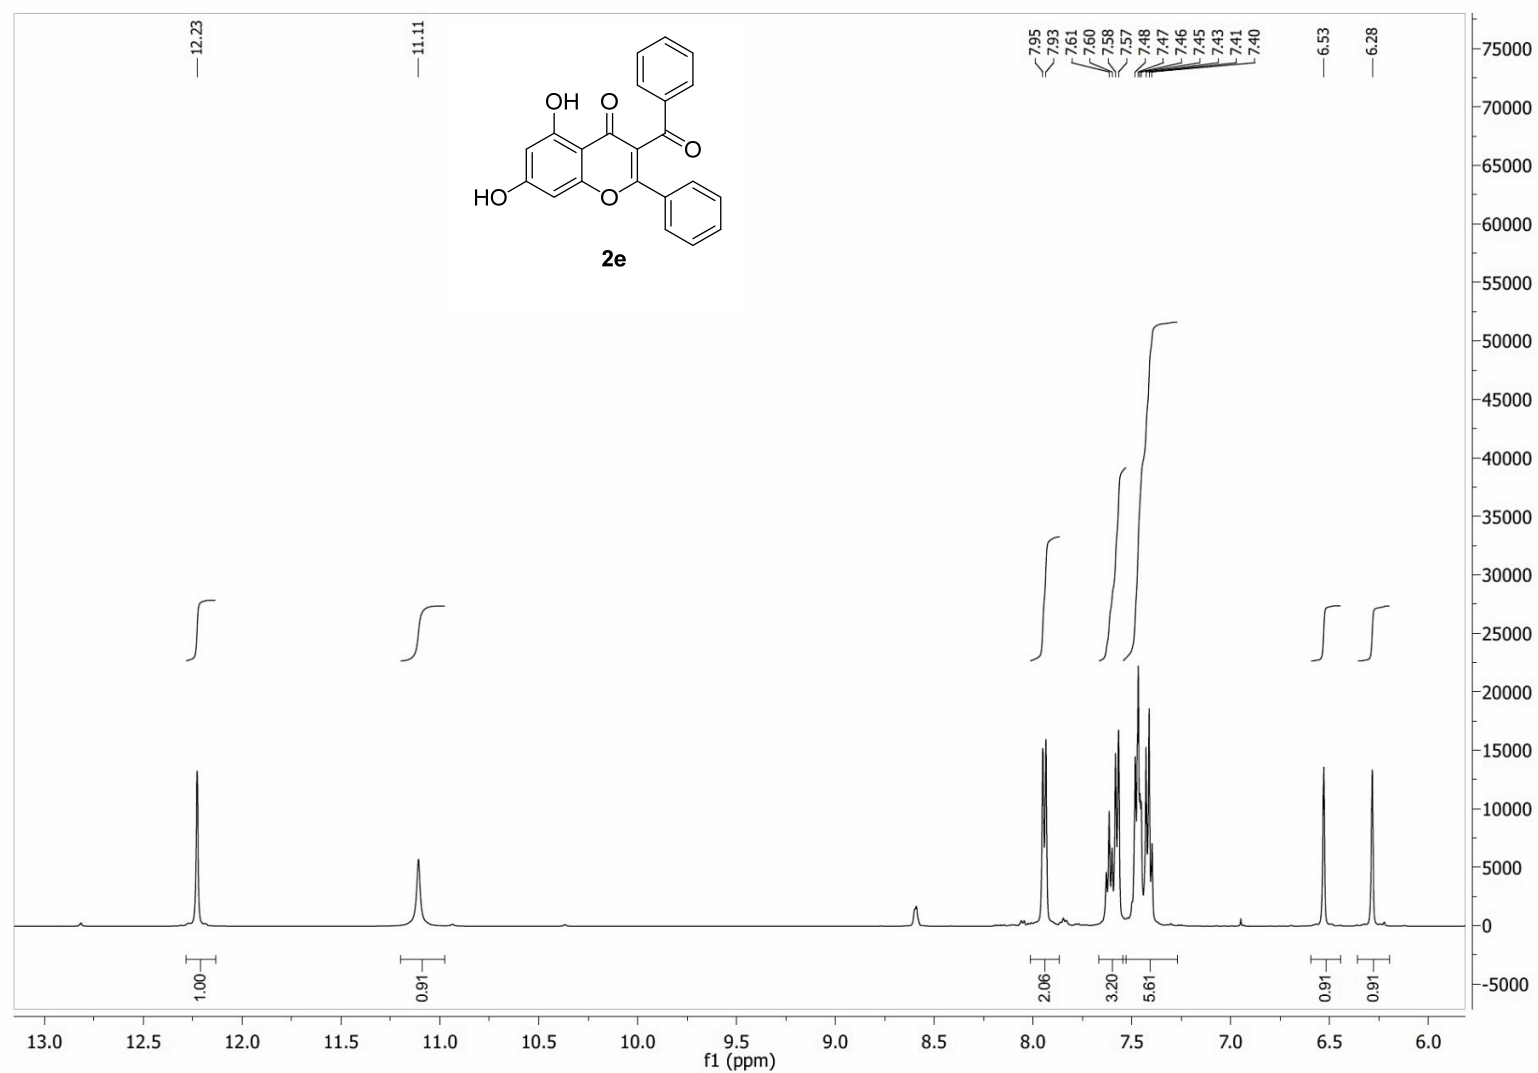

Figure S5  $^1\text{H}$ -NMR spectrum of compound **2e**



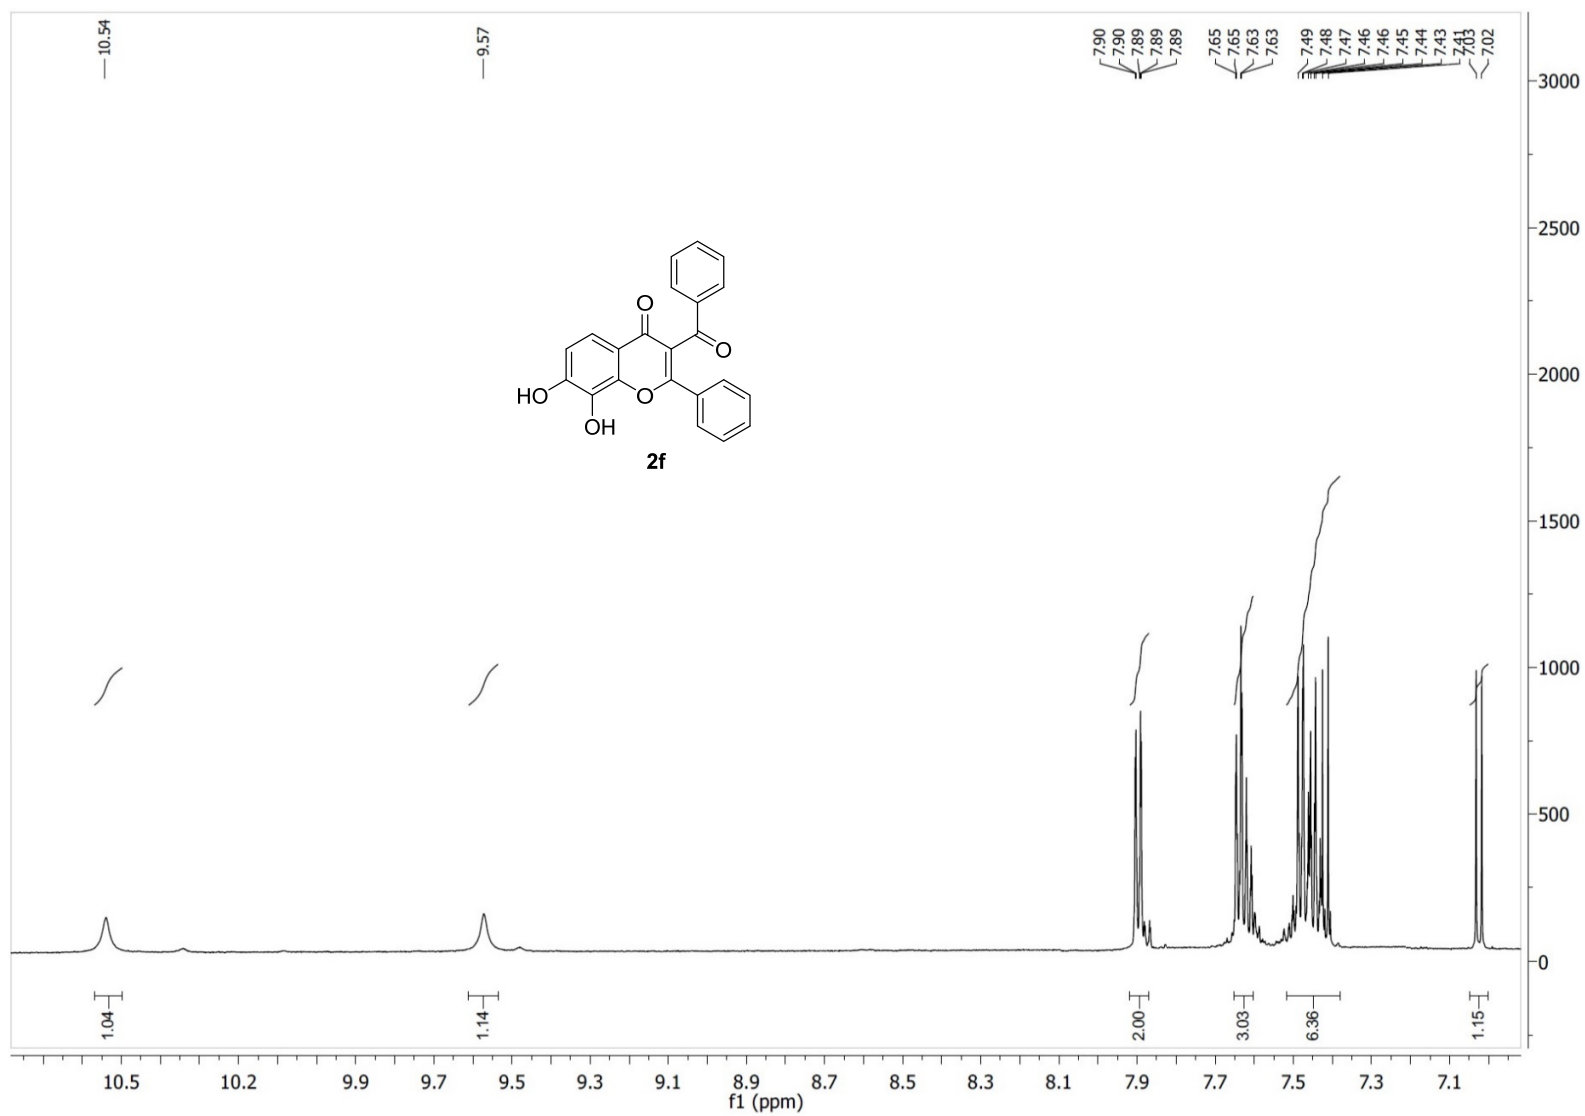

**Figure S6**  $^1\text{H}$ -NMR spectrum of compound **2f**

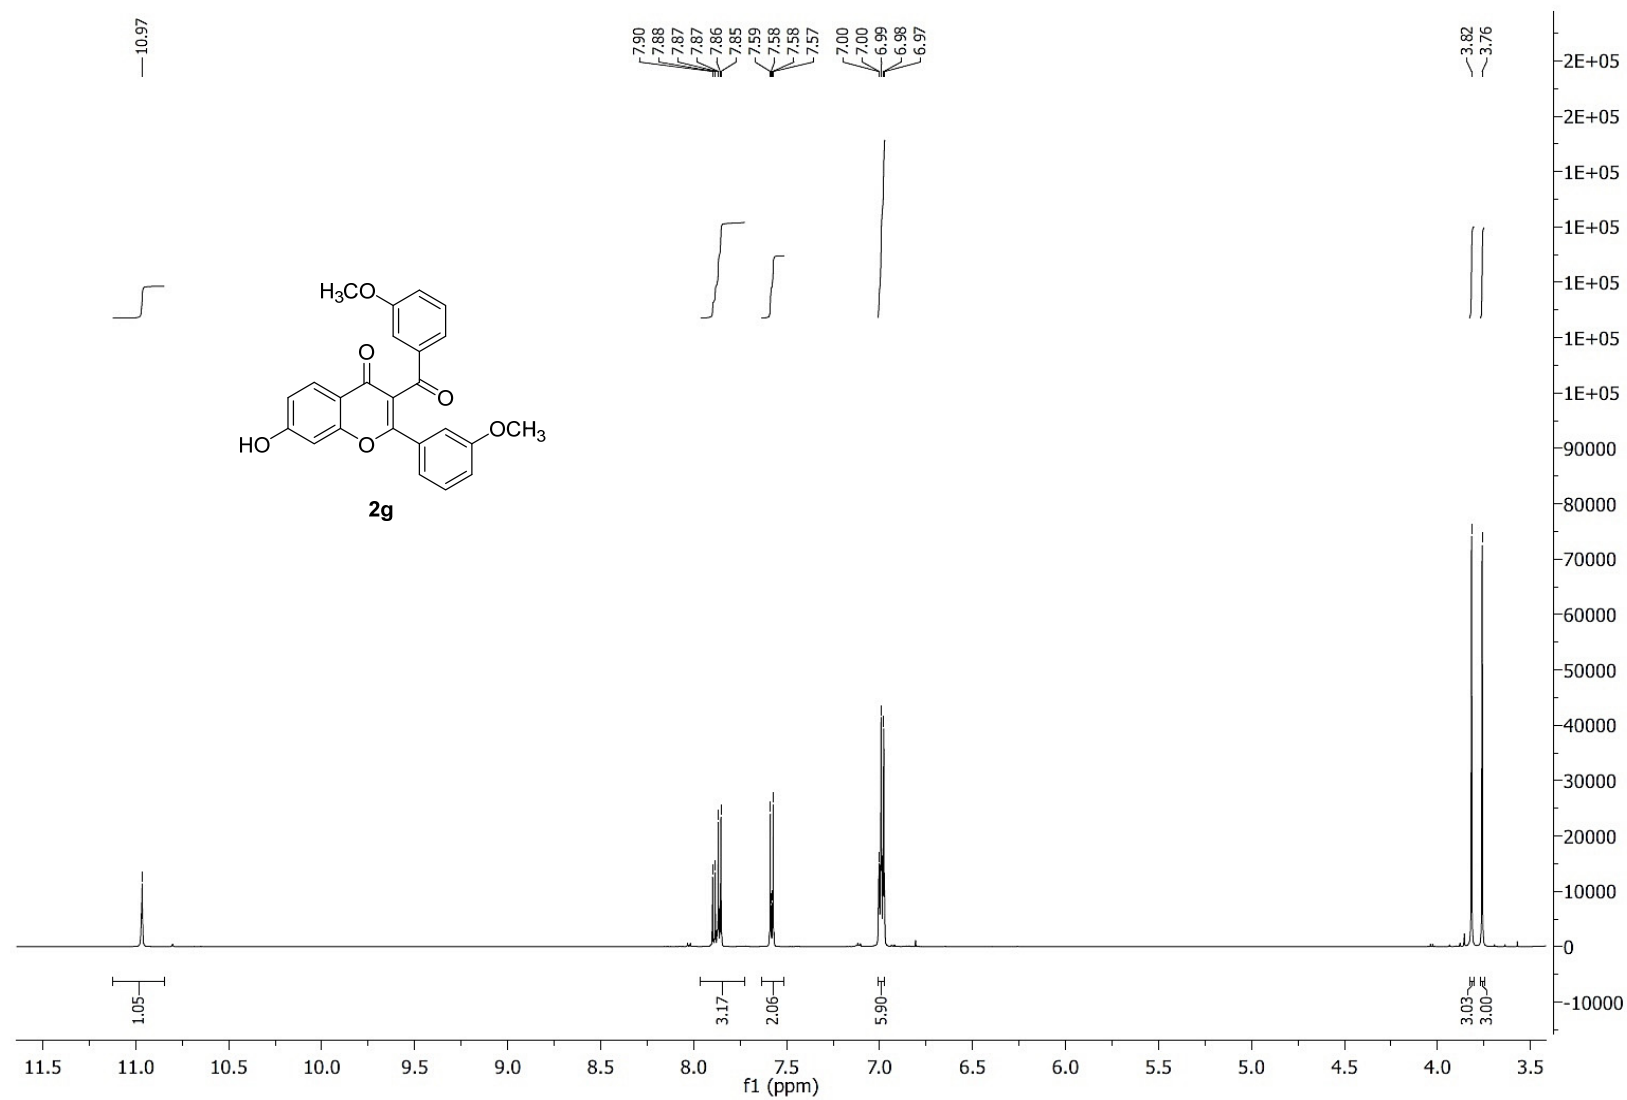

**Figure S7**  $^1\text{H}$ -NMR spectrum of compound **2g**

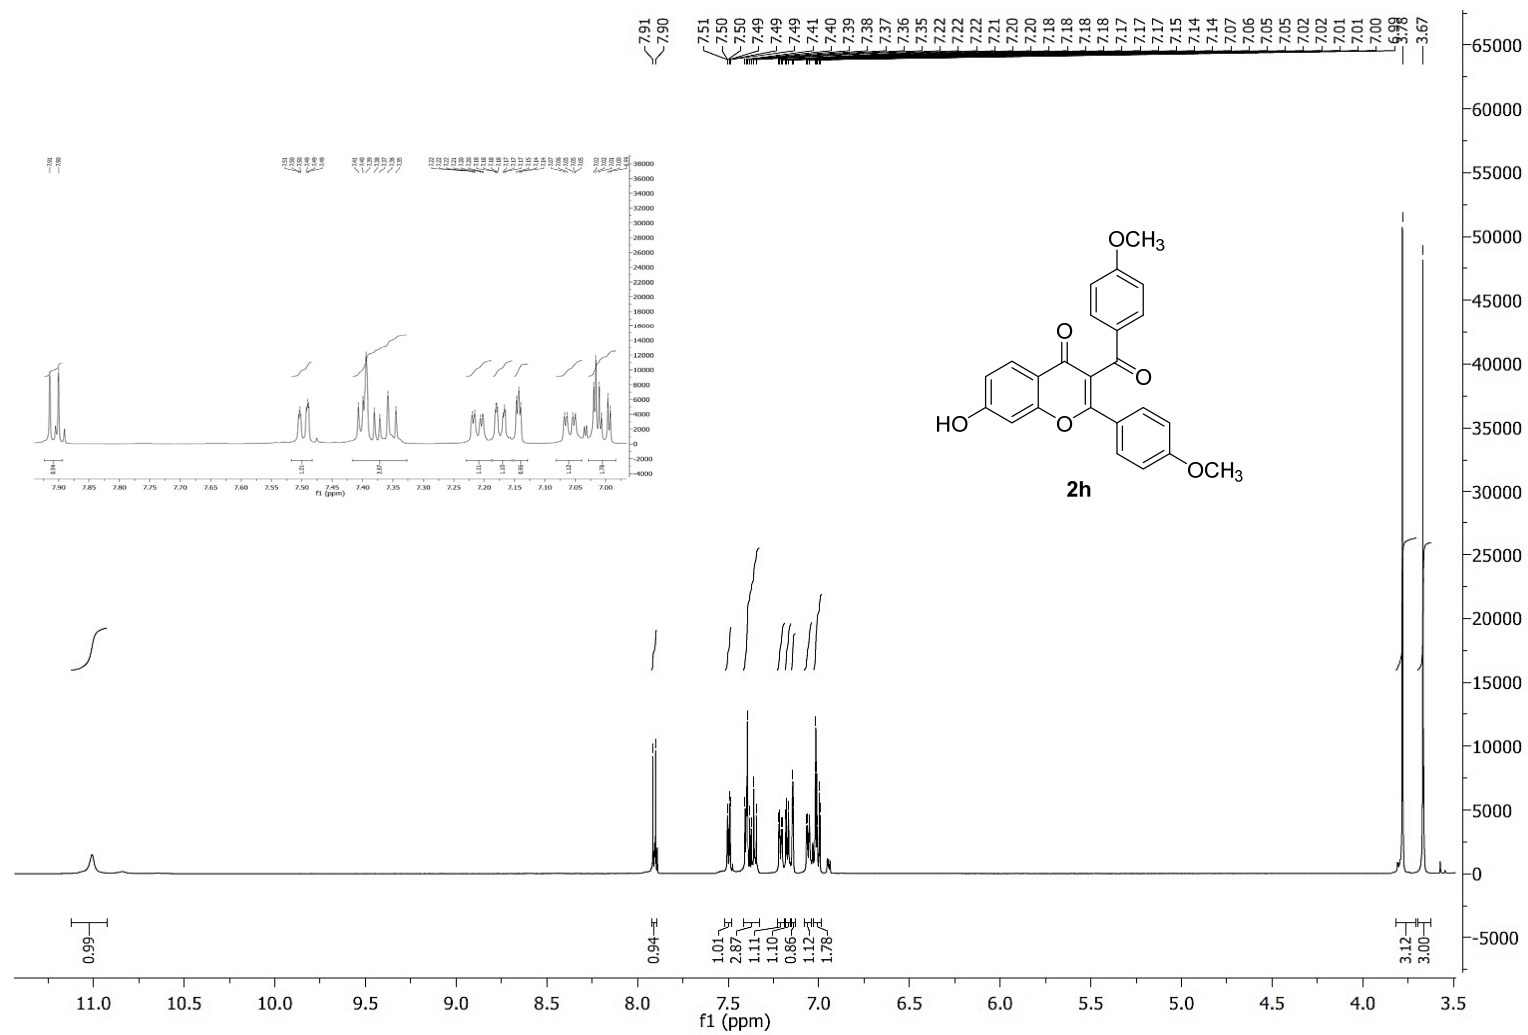

**Figure S8**  $^1\text{H}$ -NMR spectrum of compound **2h**

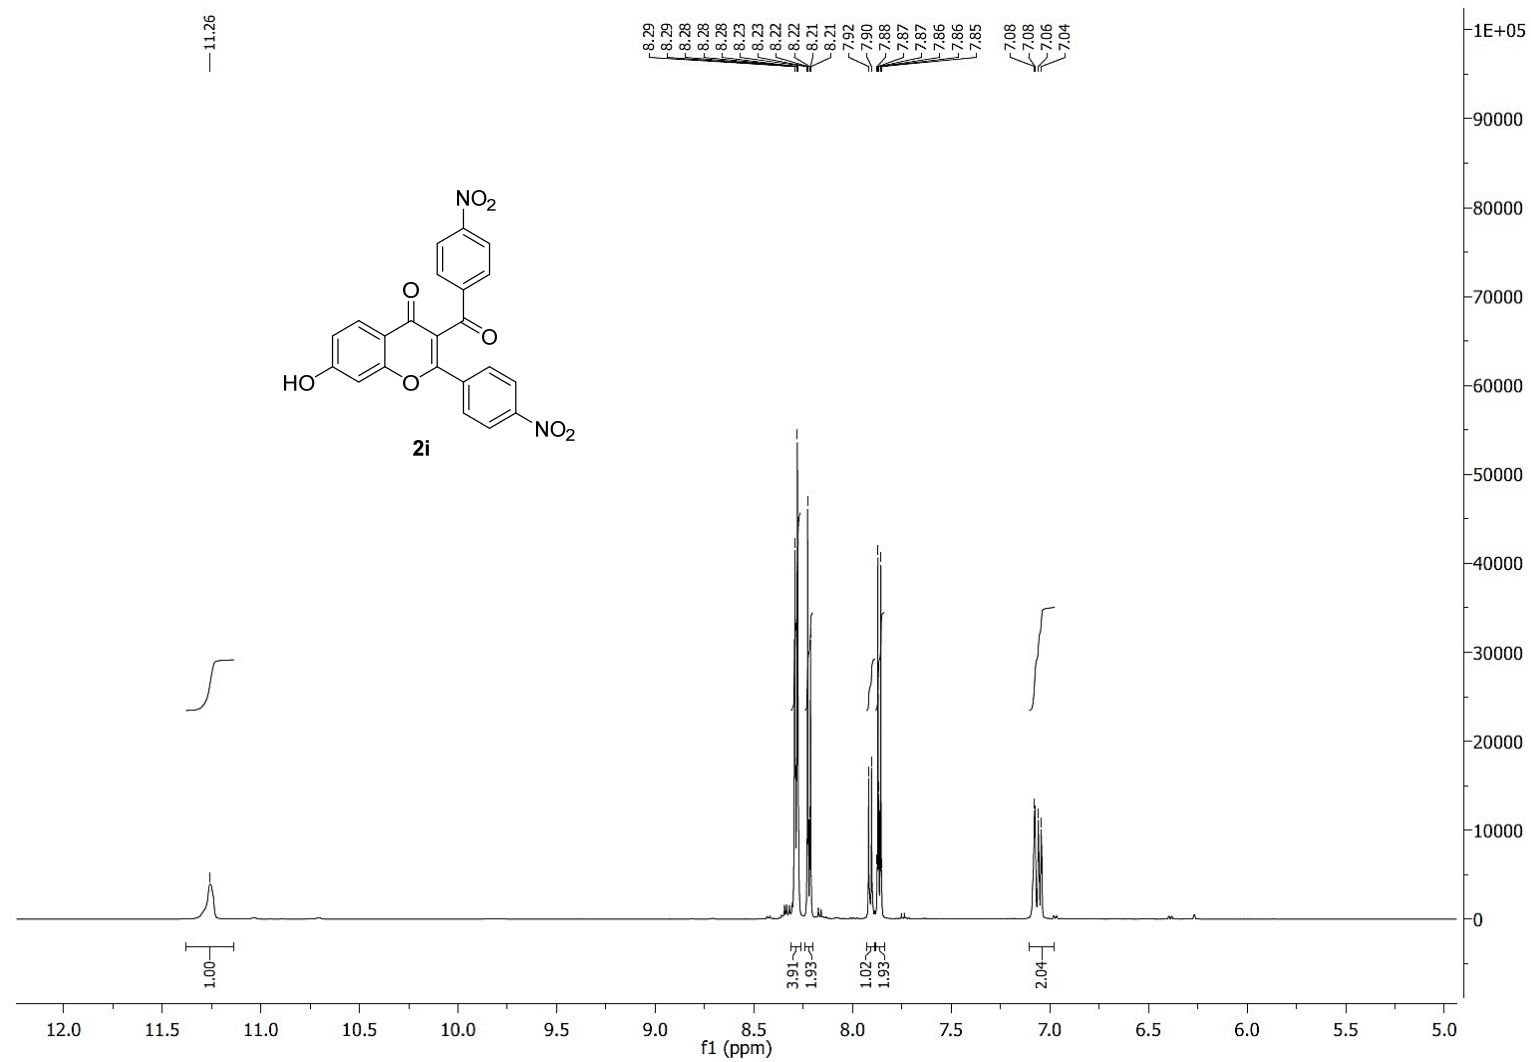

Figure S9  $^1\text{H}$ -NMR spectrum of compound **2i**

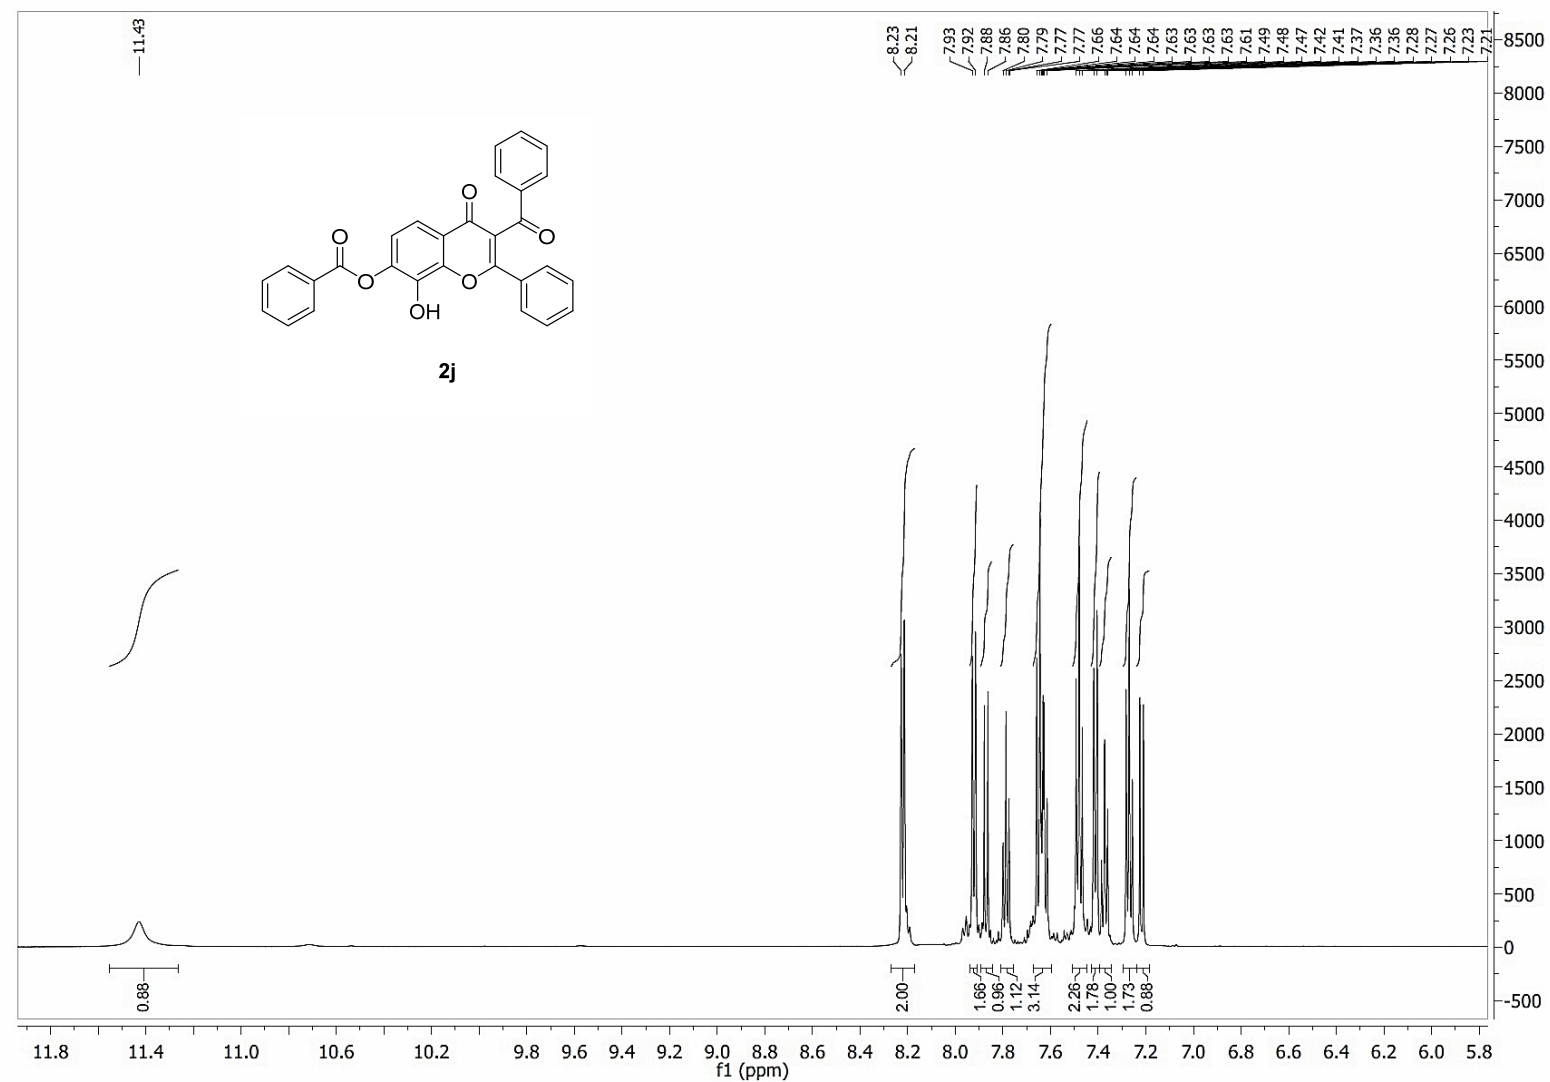

**Figure S10**  $^1\text{H}$ -NMR spectrum of compound **2j**

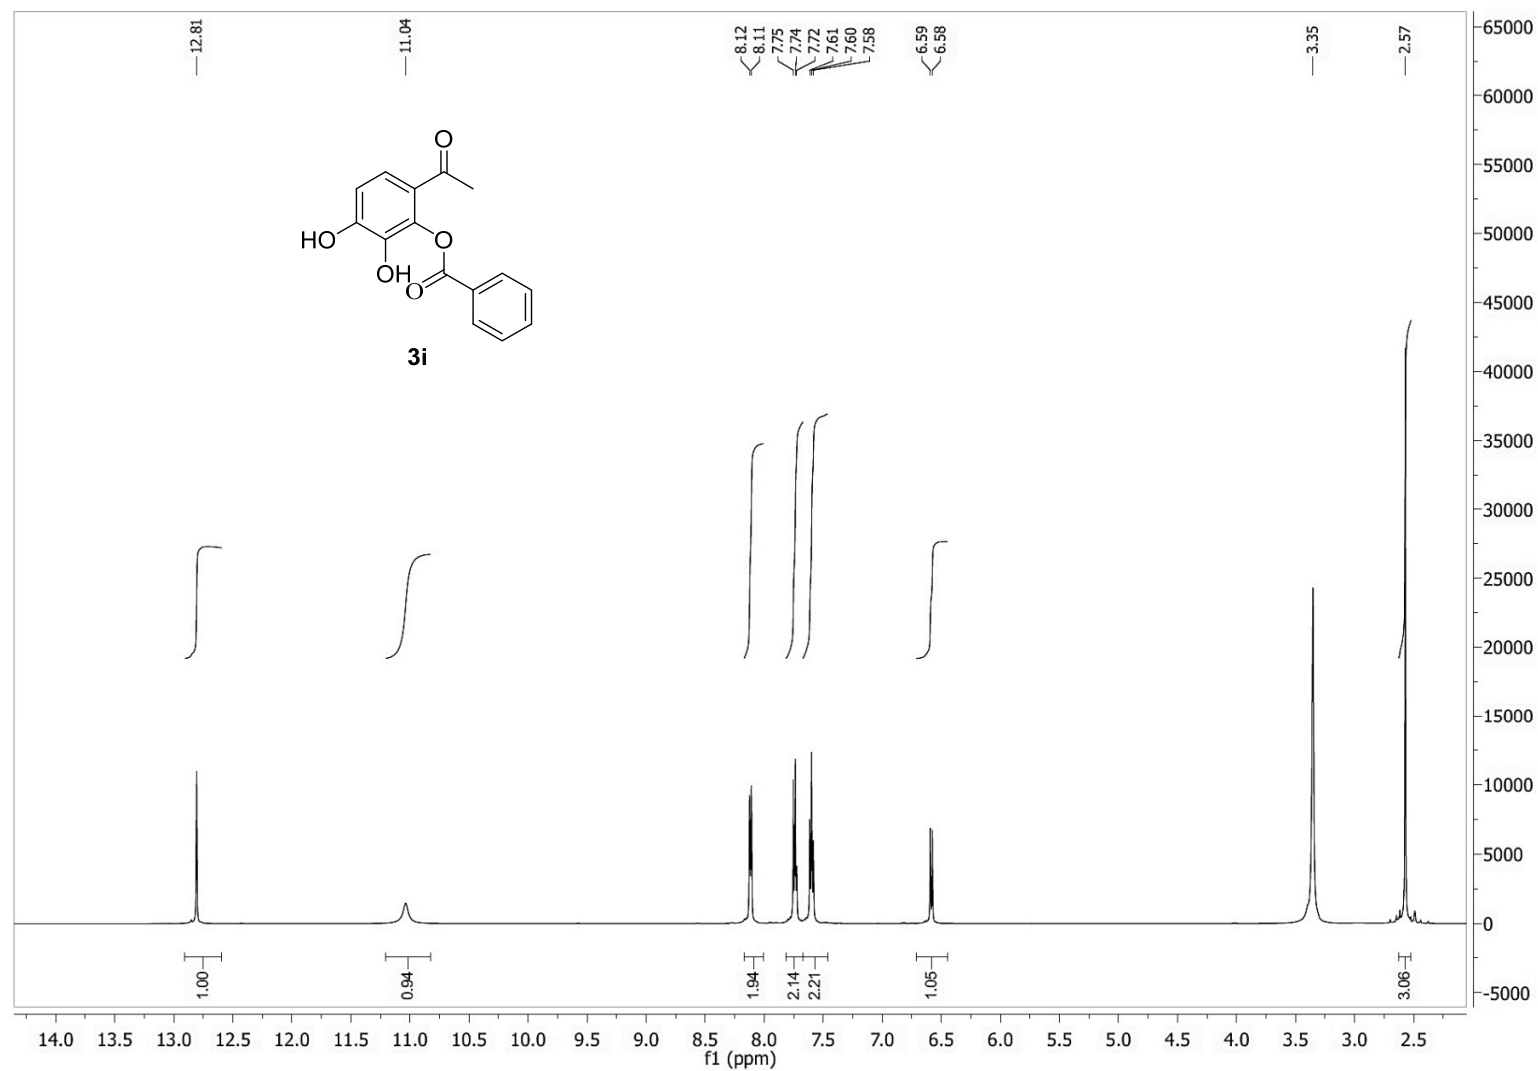

**Figure S11** <sup>1</sup>H-NMR spectrum of compound **3i**

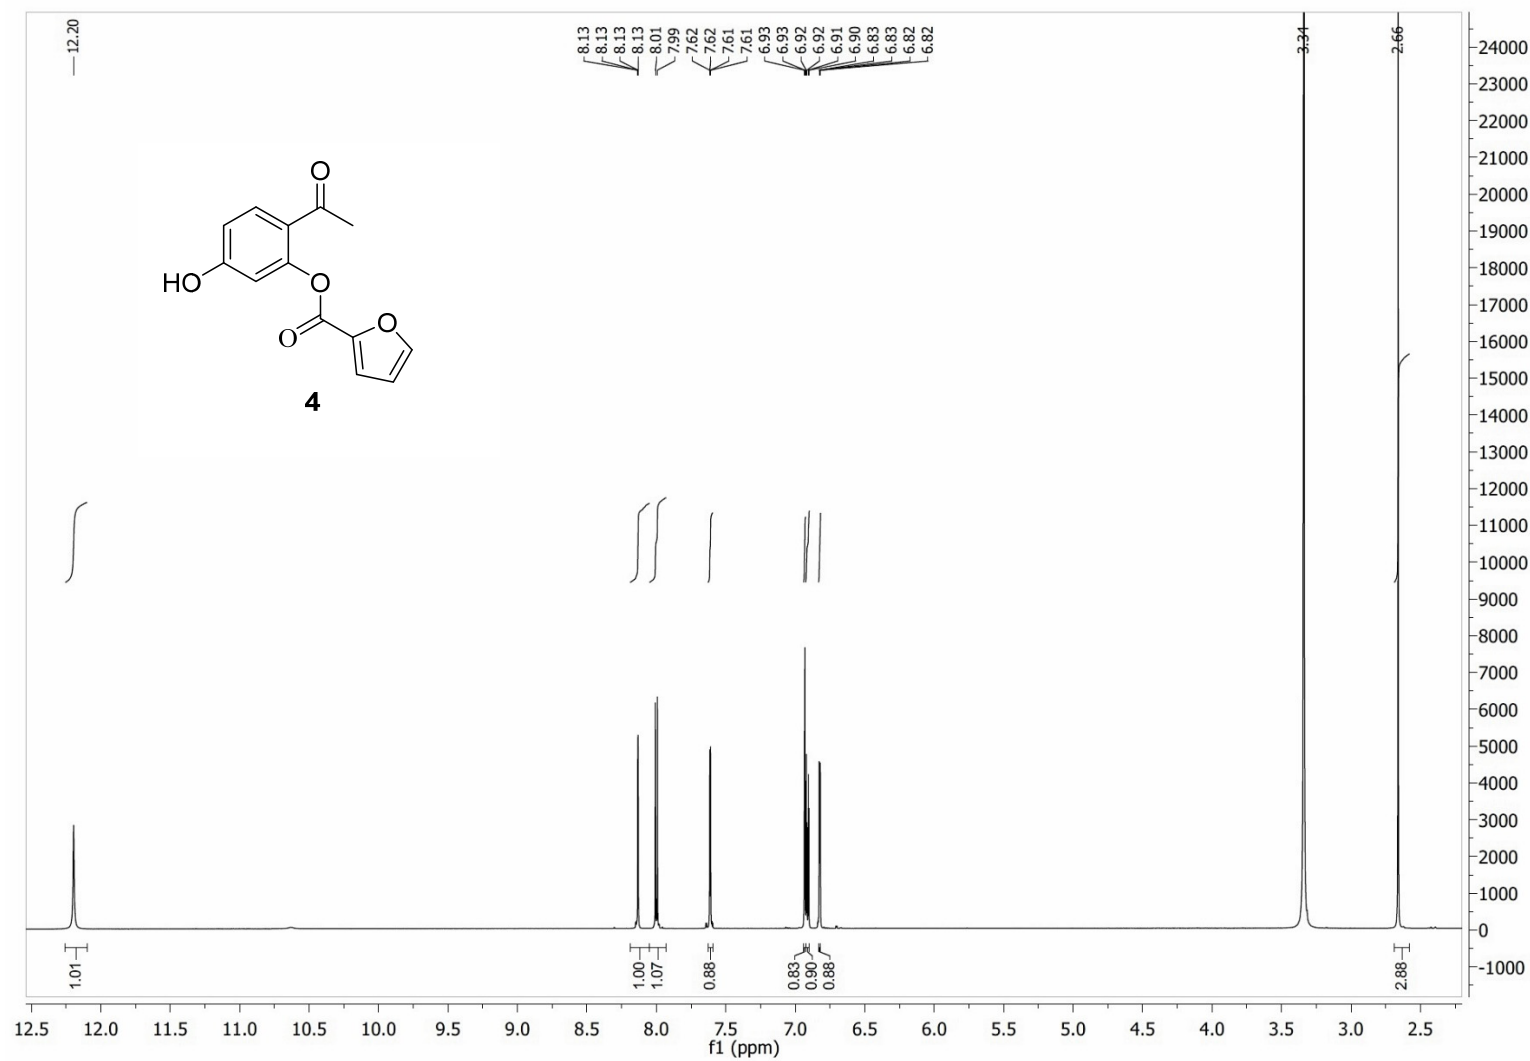

Figure S12  $^1\text{H}$ -NMR spectrum of compound 4

### 3. $^{13}\text{C}$ -NMR spectrum of synthetic compounds

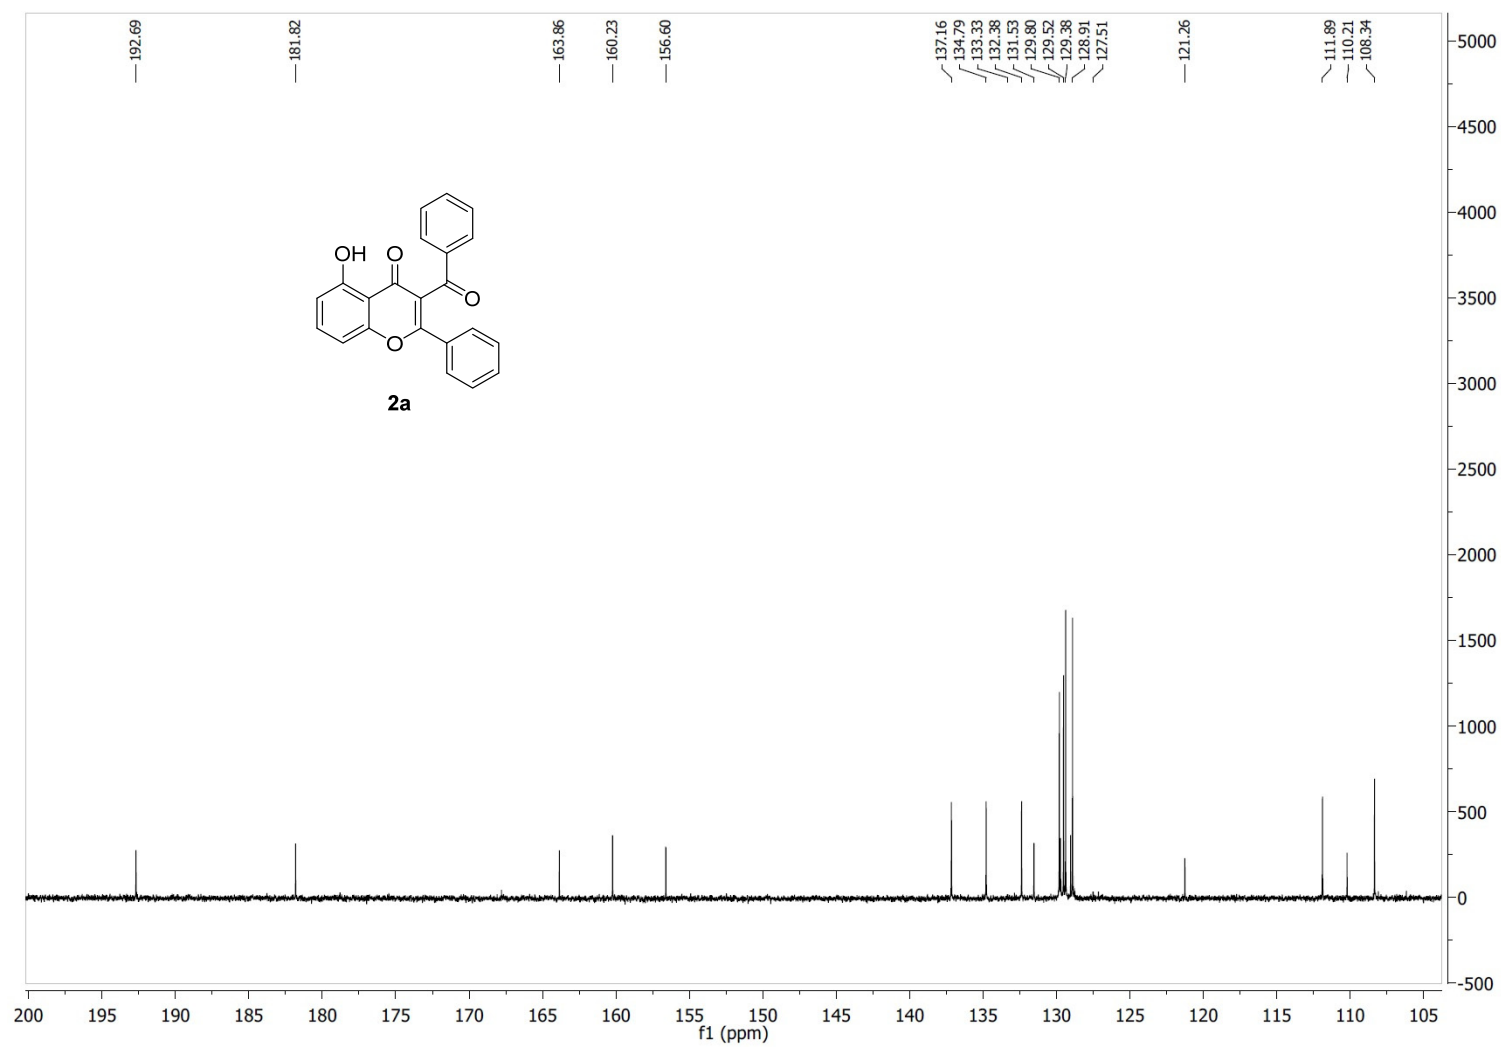

Figure S13  $^{13}\text{C}$ -NMR spectrum of compound **2a**



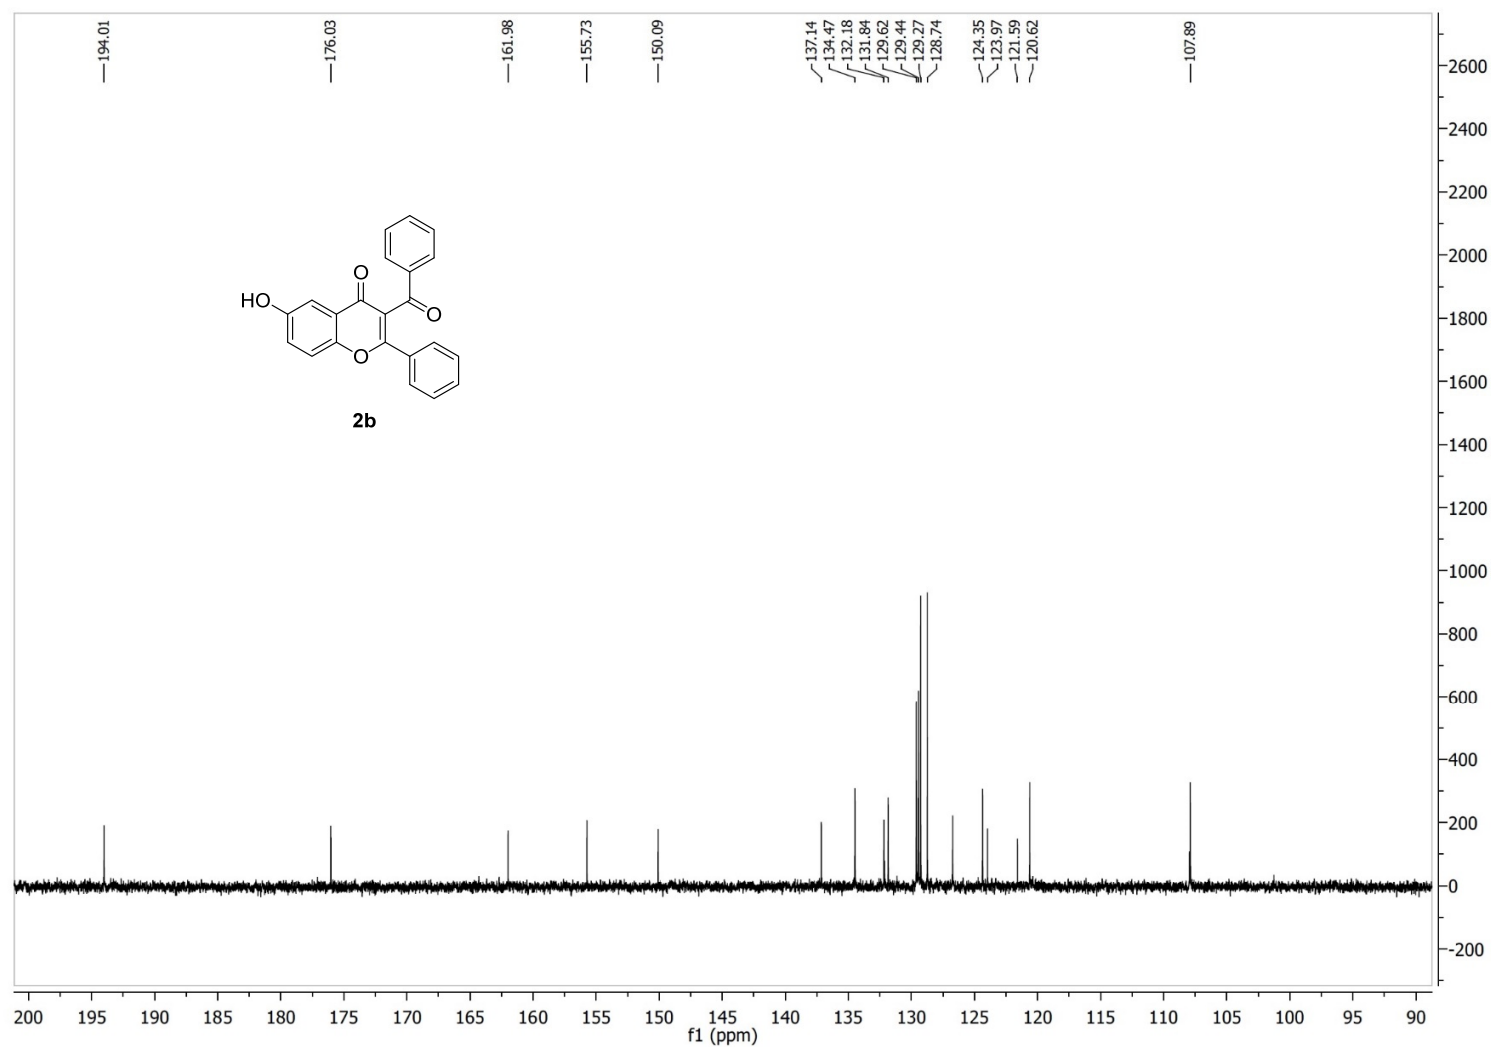

**Figure S14**  $^{13}\text{C}$ -NMR spectrum of compound **2b**

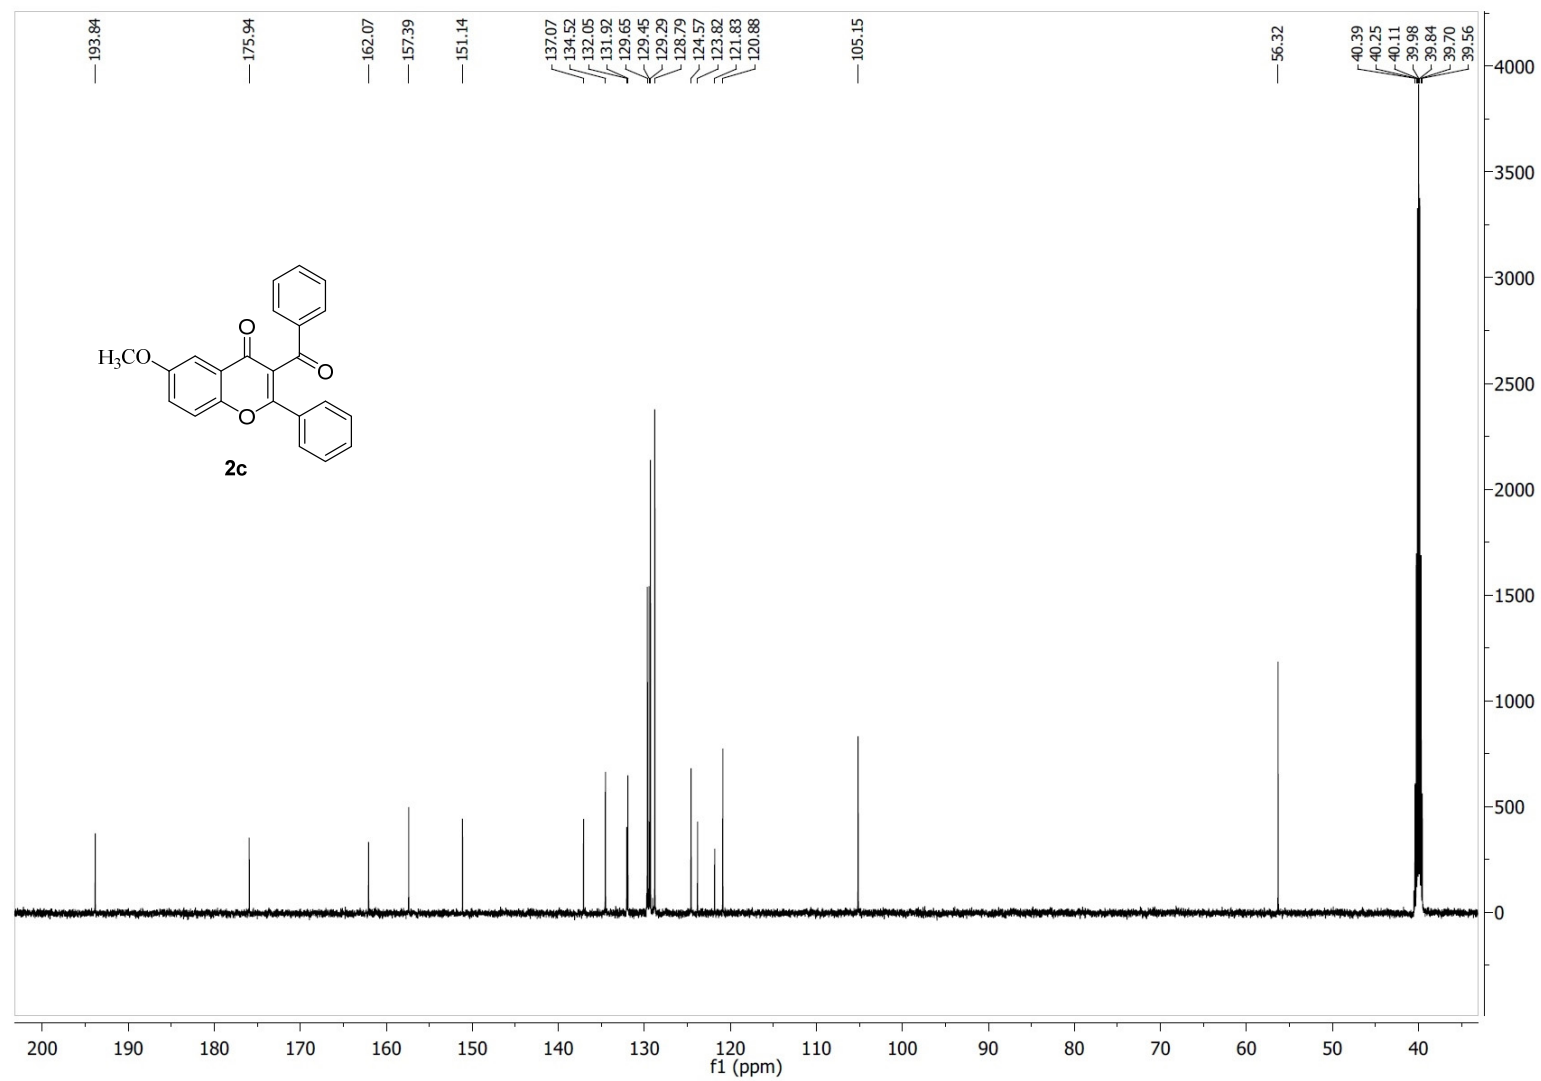

Figure S15  $^{13}\text{C}$ -NMR spectrum of compound **2c**

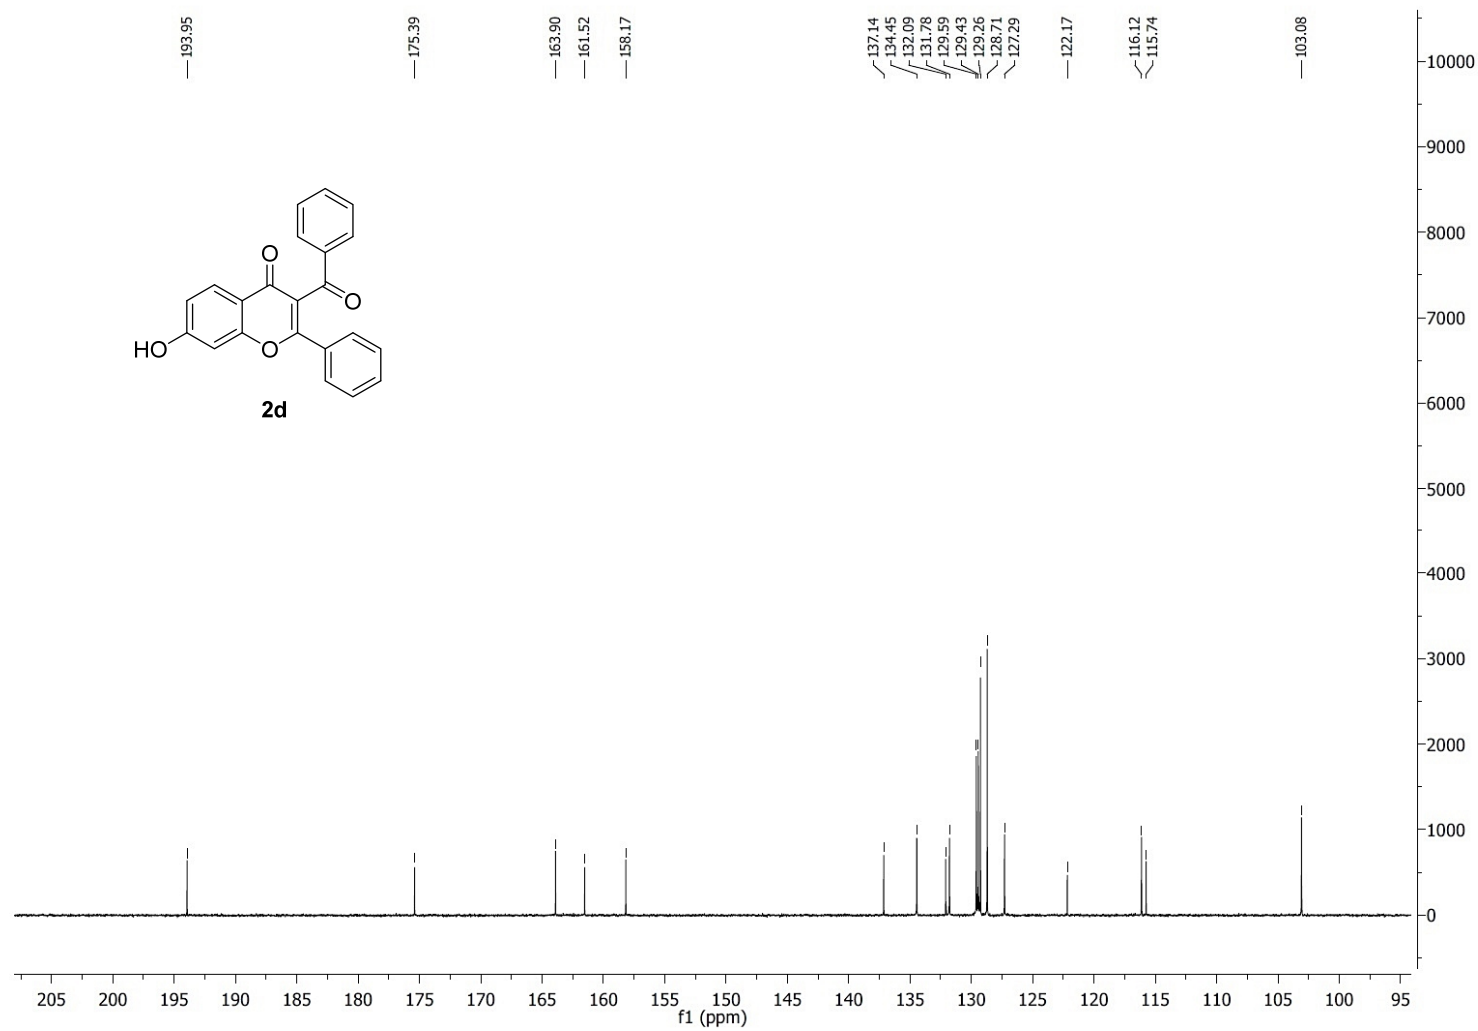

**Figure S16**  $^{13}\text{C}$ -NMR spectrum of compound **2d**

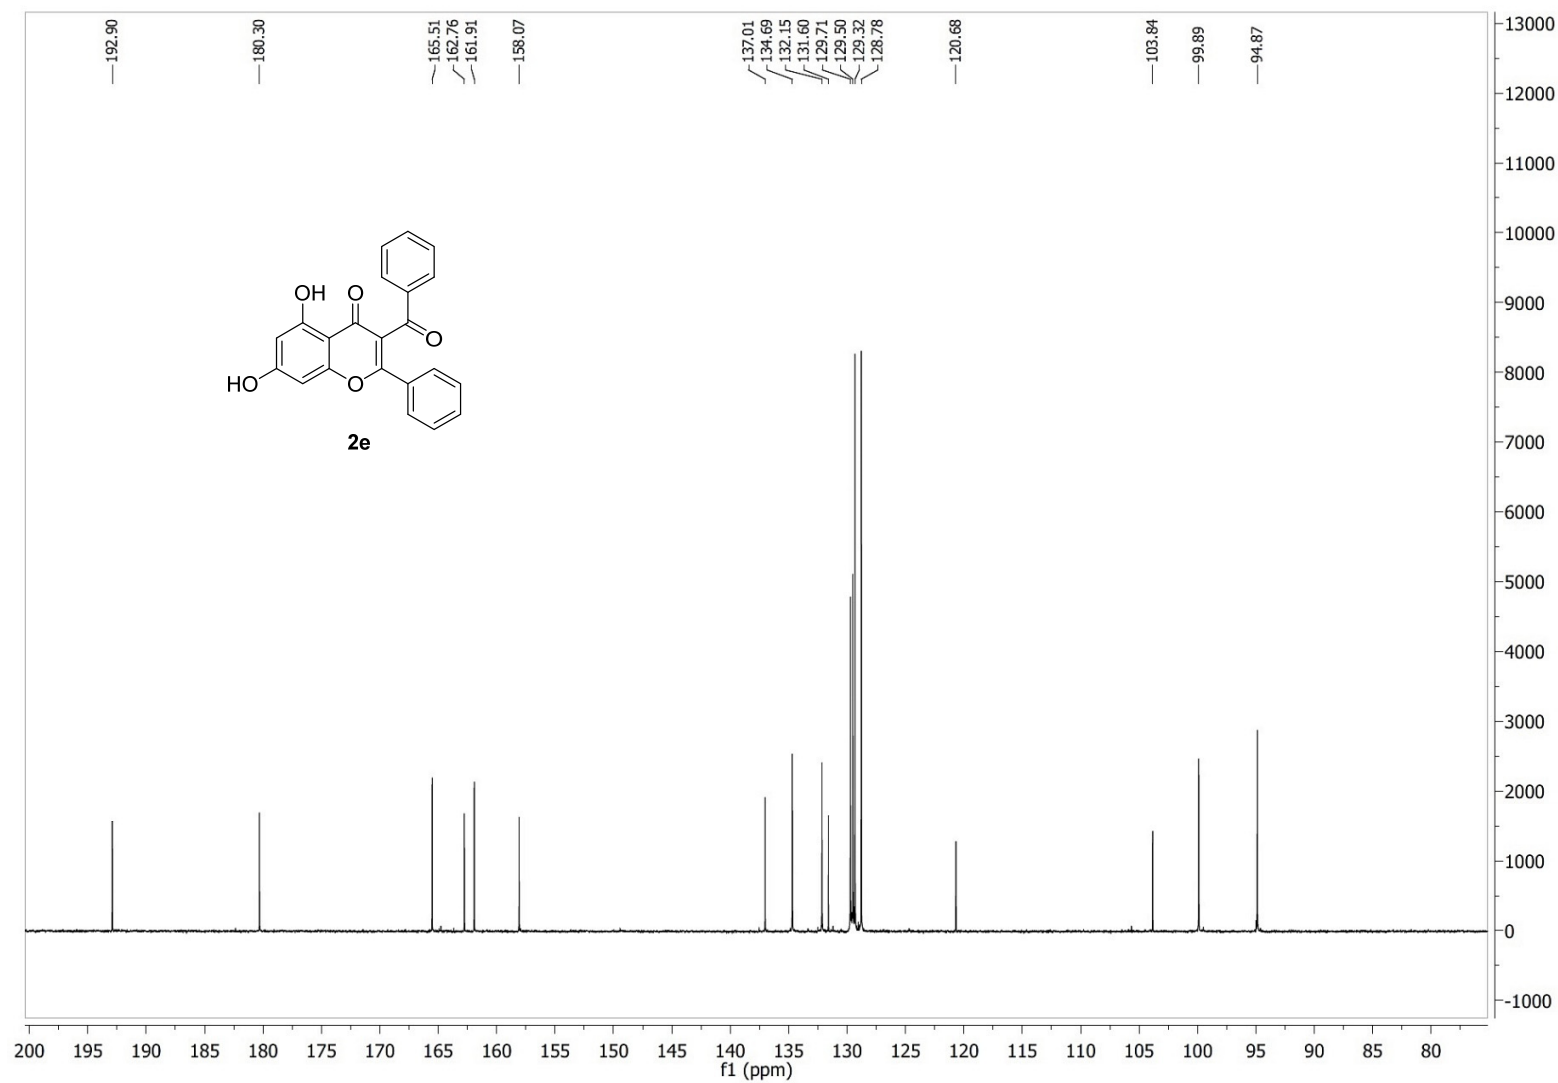

**Figure S17**  $^{13}\text{C}$ -NMR spectrum of compound **2e**

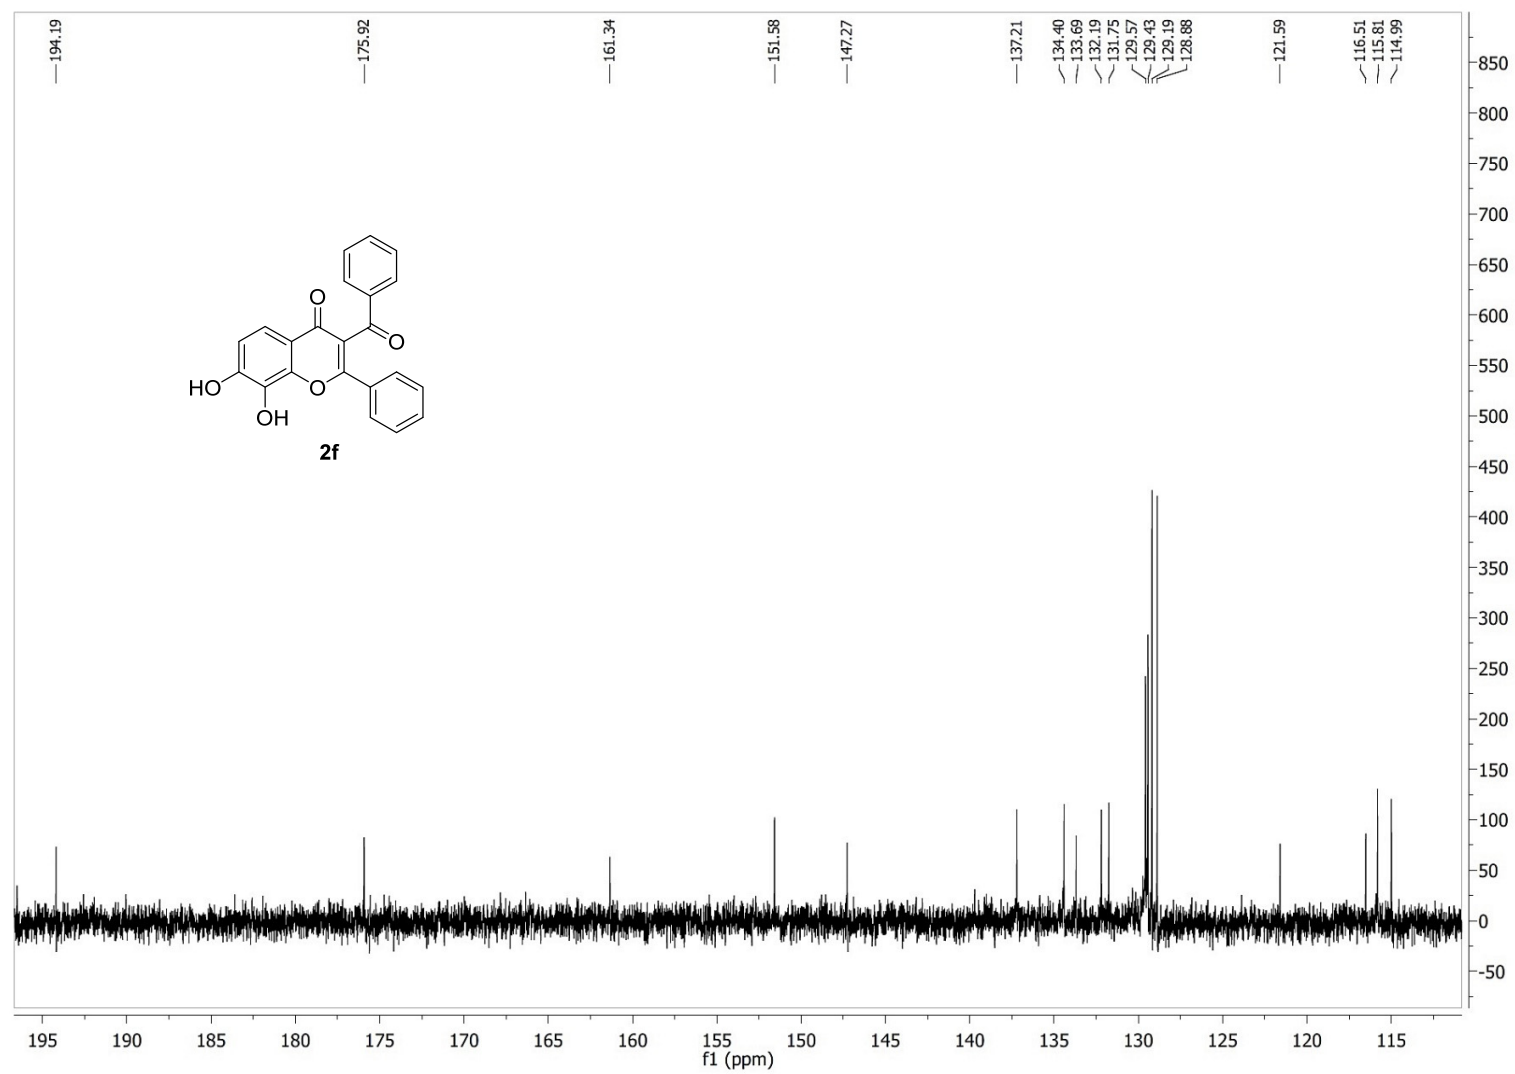

**Figure S18**  $^{13}\text{C}$ -NMR spectrum of compound **2f**

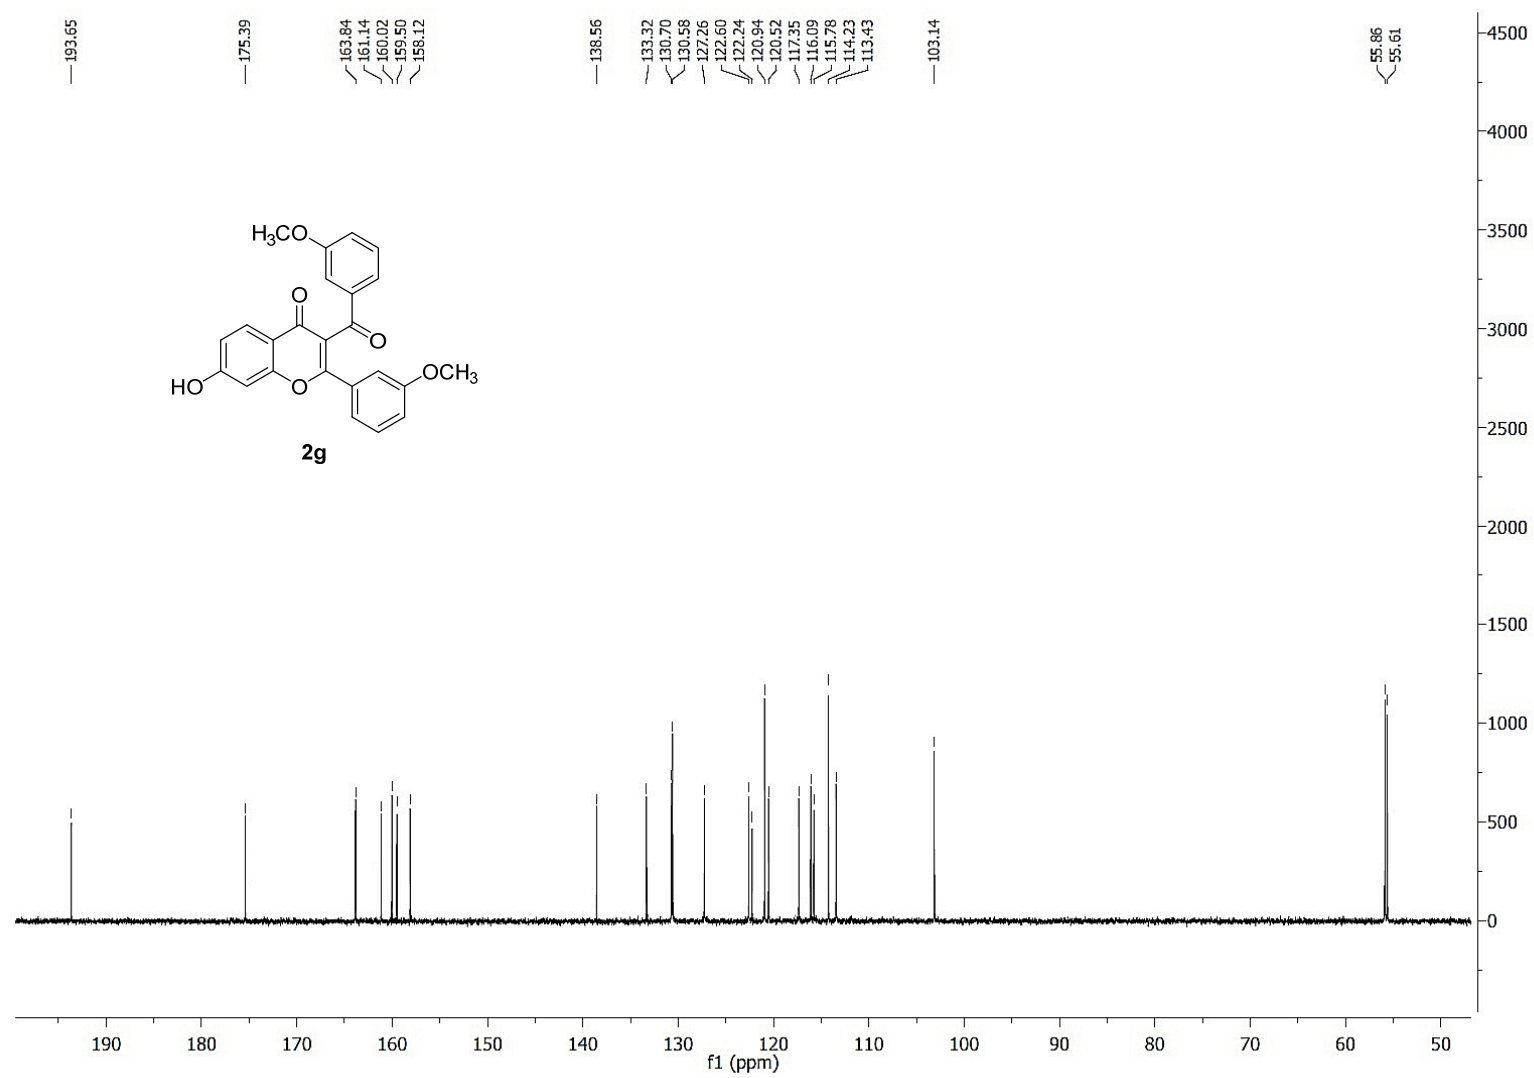

Figure S19 <sup>13</sup>C-NMR spectrum of compound **2g**

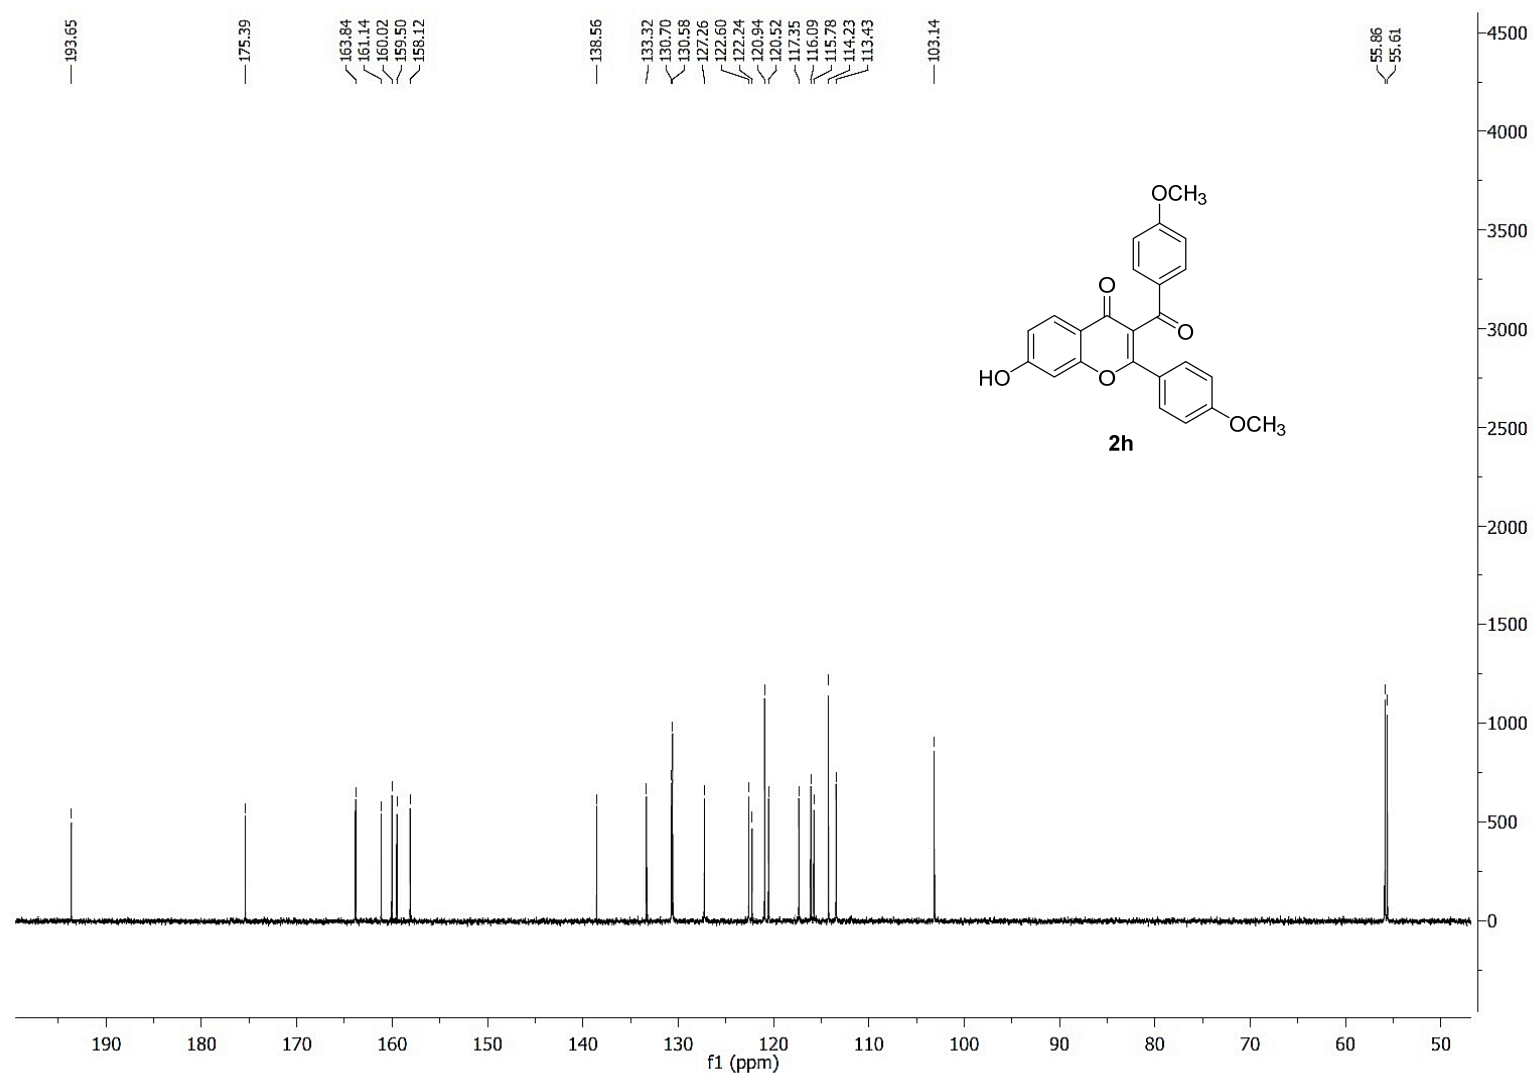

Figure S20  $^{13}\text{C}$ -NMR spectrum of compound **2h**

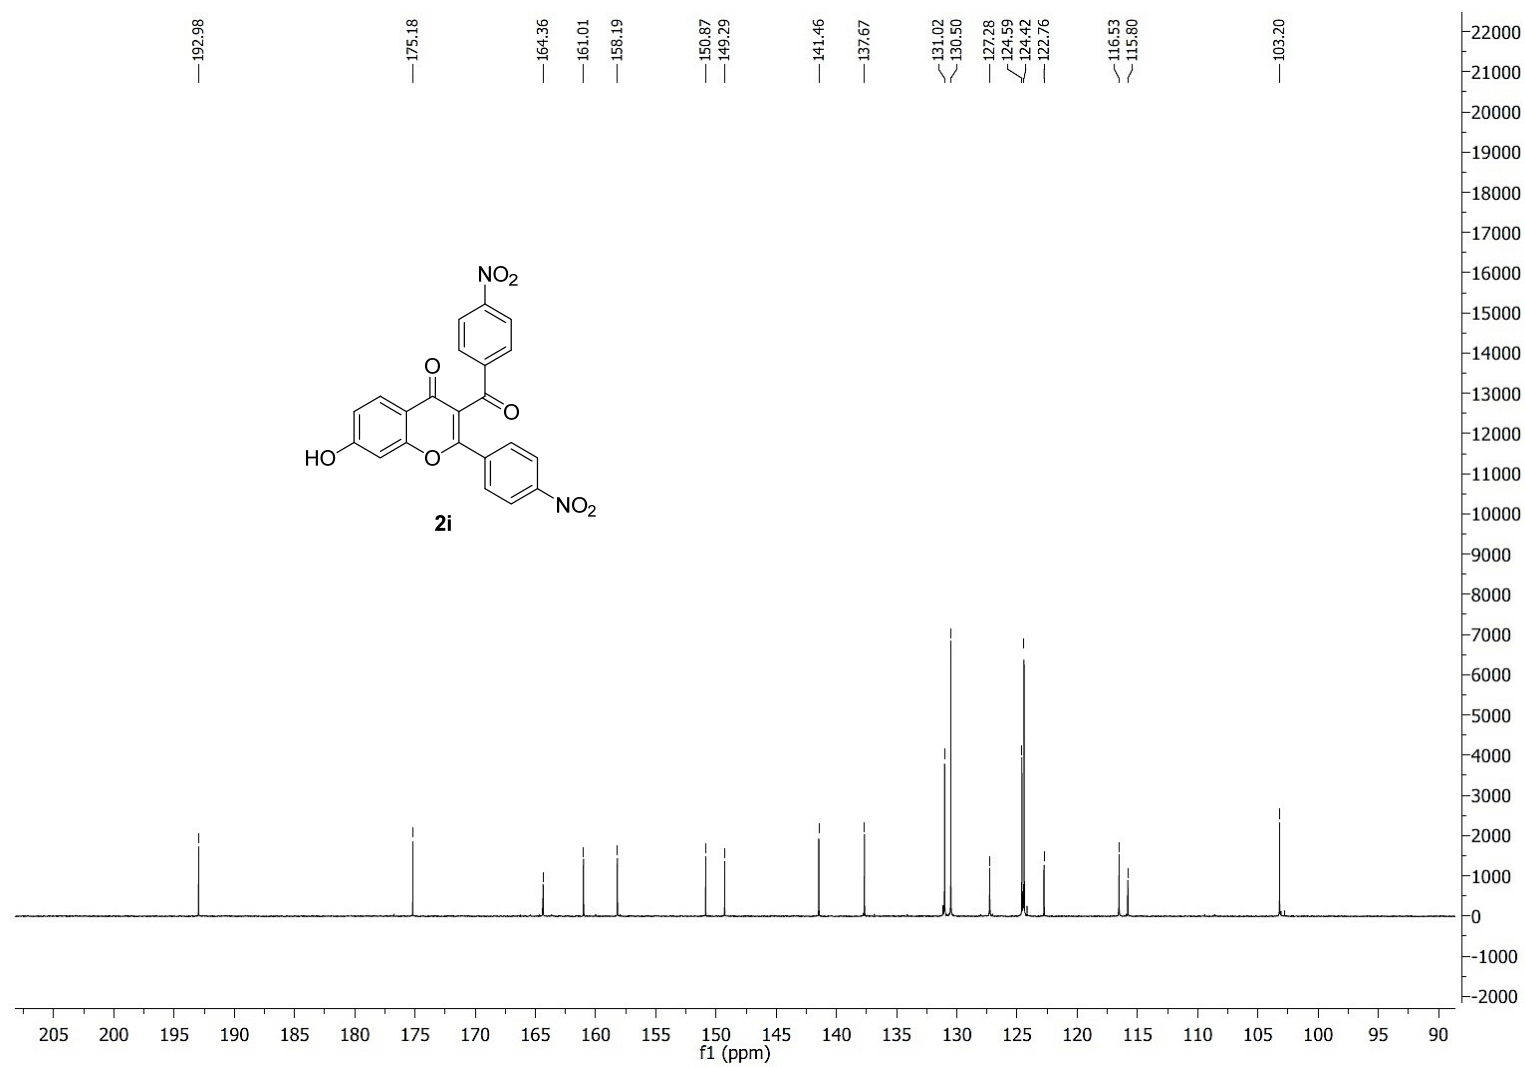

**Figure S21**  $^{13}\text{C}$ -NMR spectrum of compound **2i**



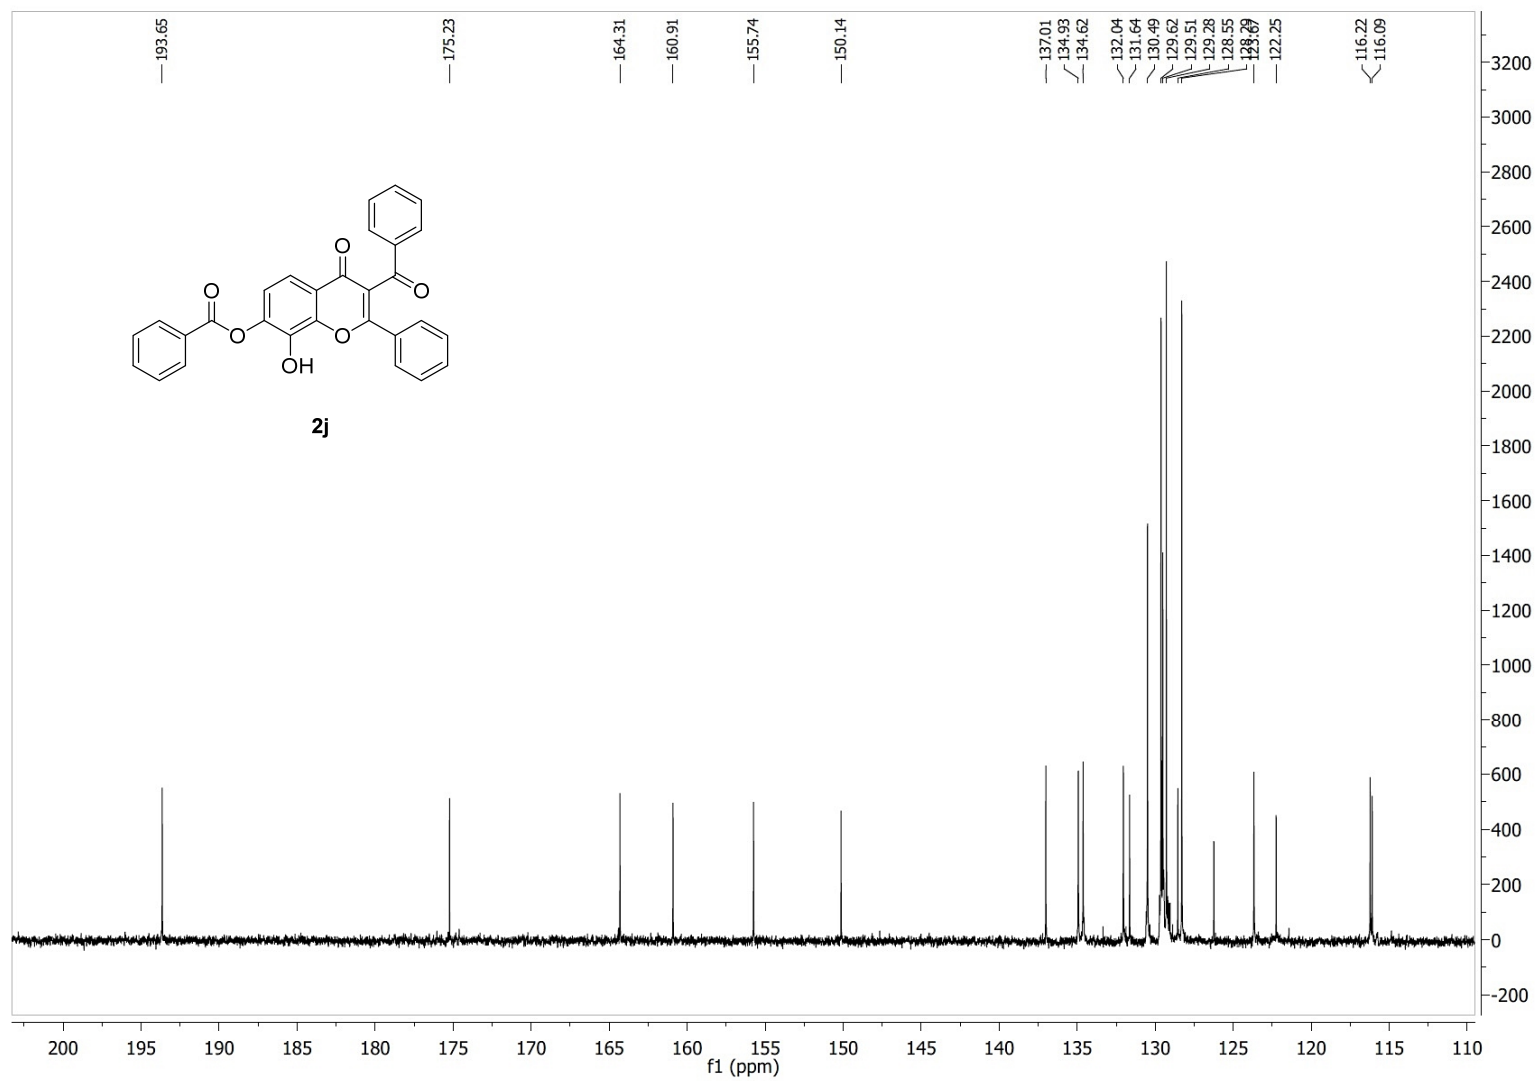

Figure S22  $^{13}\text{C}$ -NMR spectrum of compound **2j**

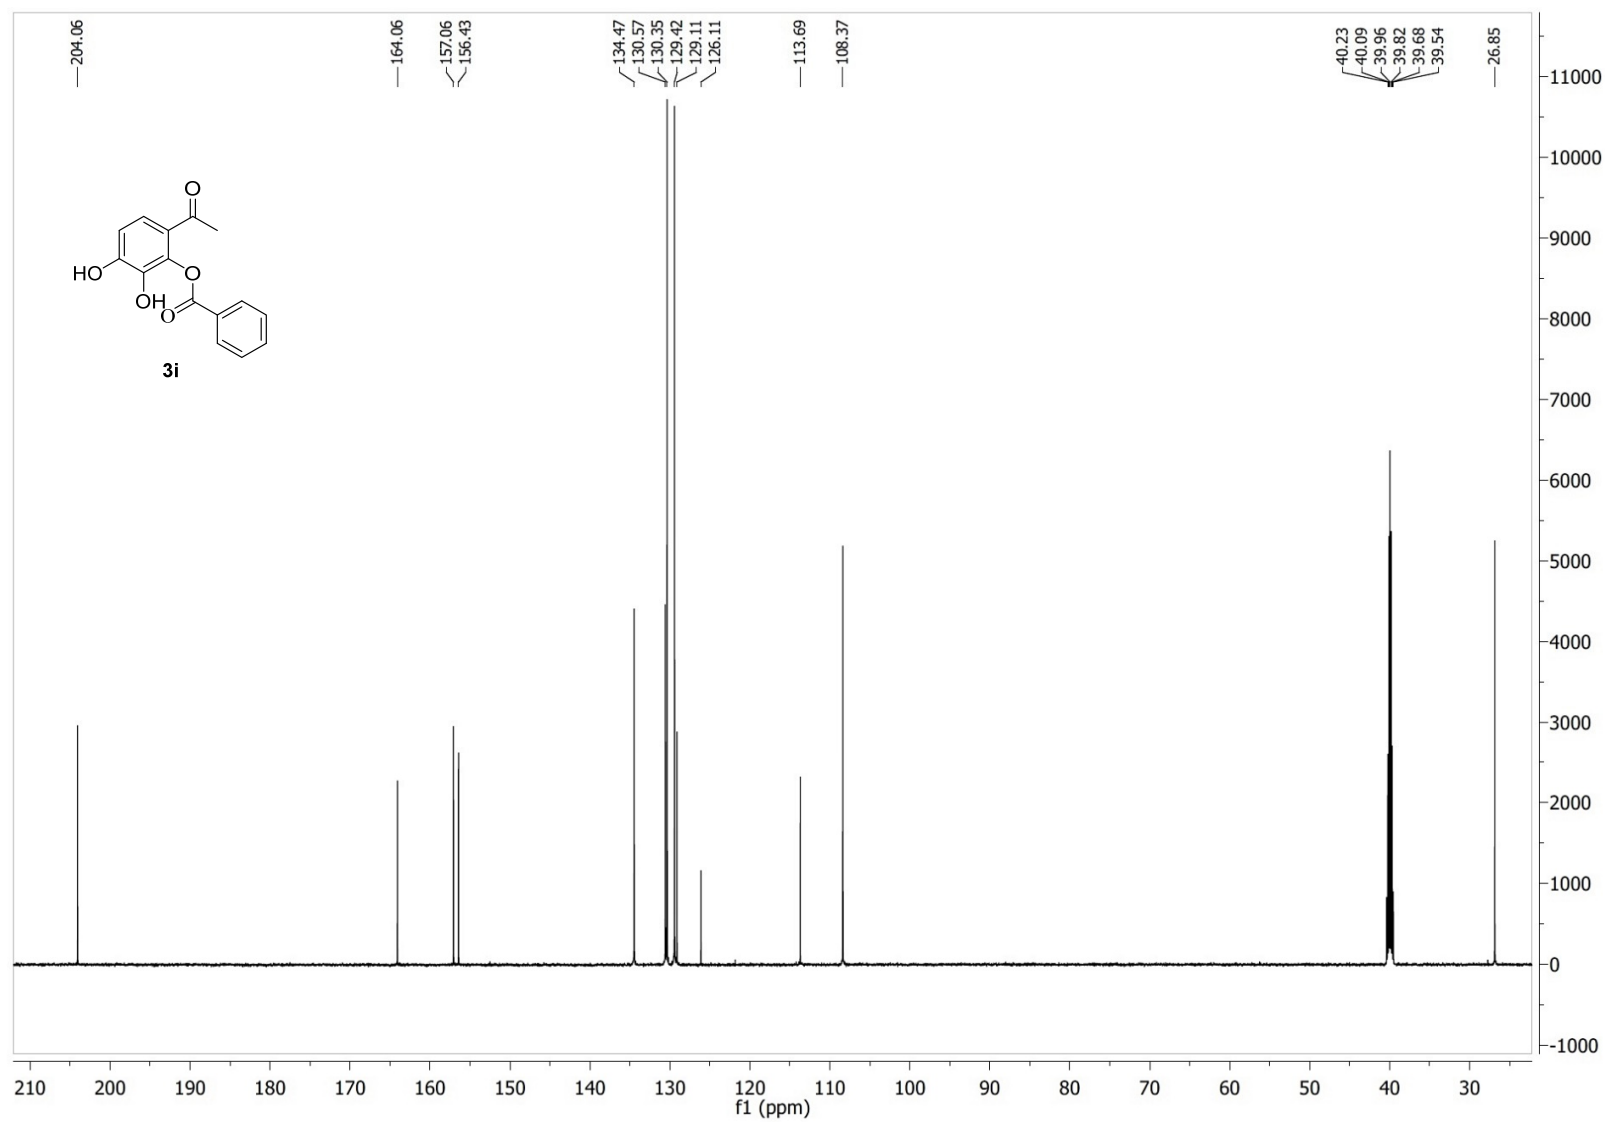

**Figure S23** <sup>13</sup>C-NMR spectrum of compound **3i**

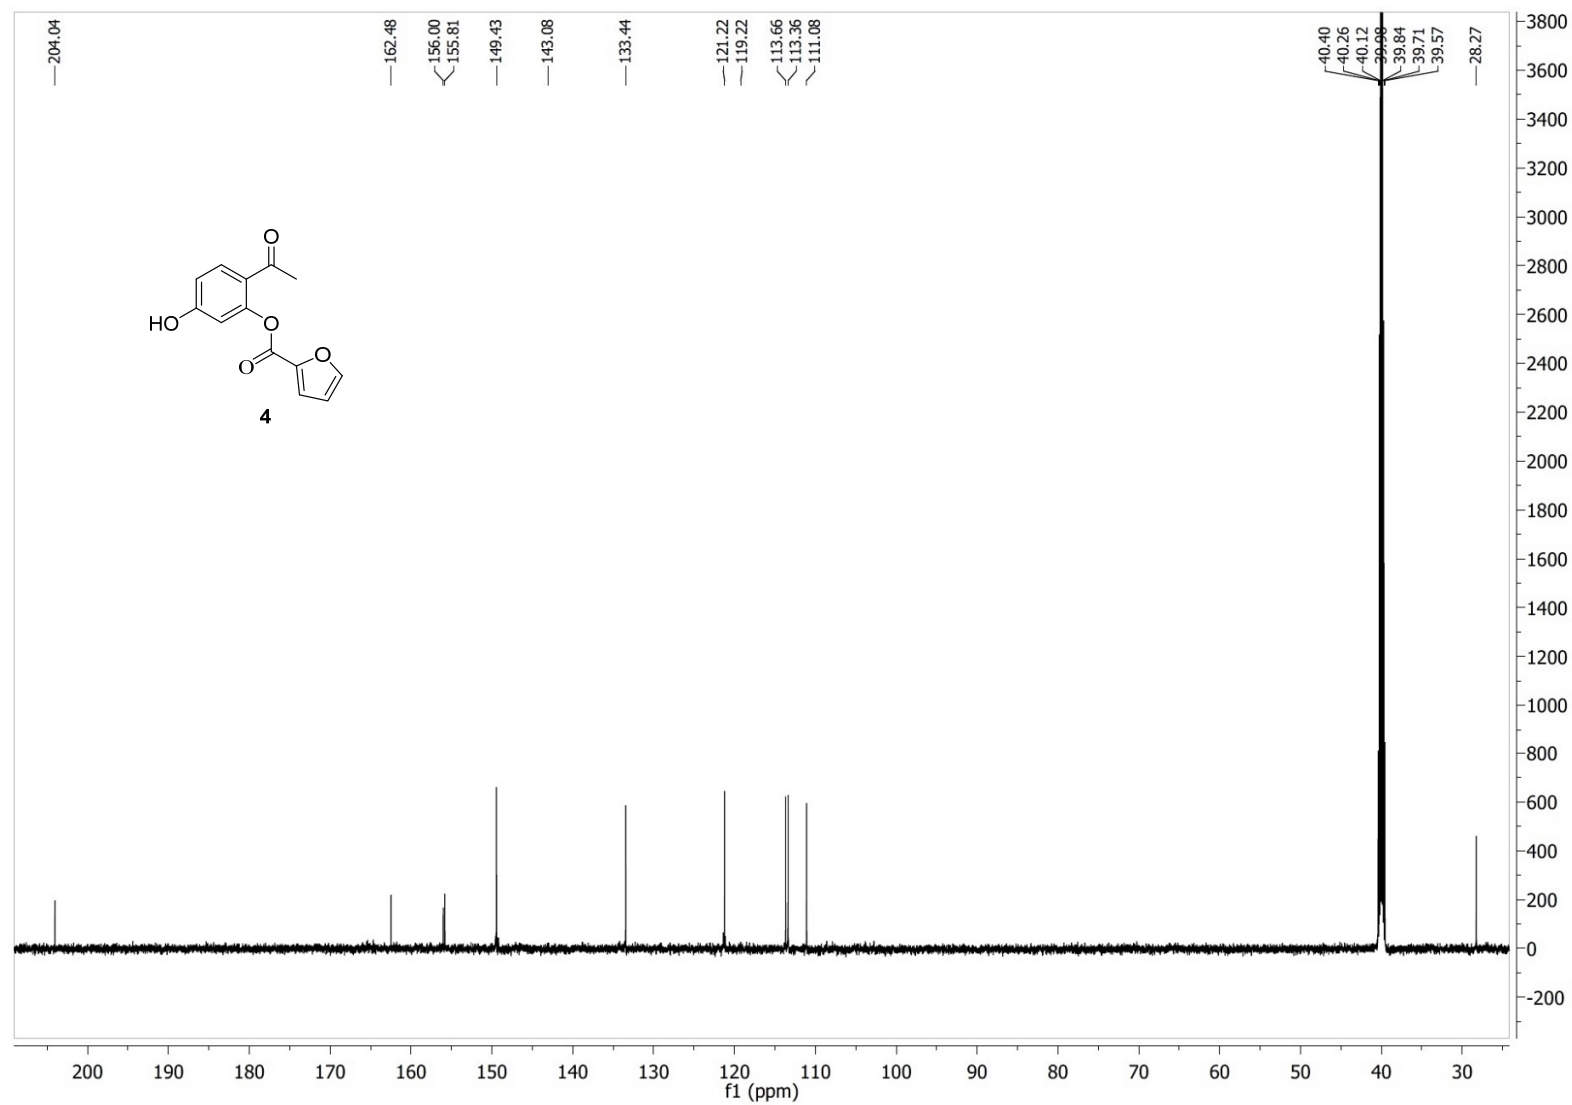

**Figure S24**  $^{13}\text{C}$ -NMR spectrum of compound 4

#### **4. LCMS spectrum of synthetic compounds**

##### **Mass spectroscopy condition**

The LC–ESI–MS/QTOF-MS system consists of HPLC unit 1260 infinity series (Agilent Technologies, Waldbronn, Germany) coupled with an ultra-high-definition accurate mass spectrometer (Agilent Technologies, Singapore). One microliter was injected to the system at a flow rate of 0.5 mL/min. The column temperature was maintained at 35 °C. The mobile phase consisted of A (0.1% formic acid in type I water, v/v) and B (0.1% formic acid in acetonitrile, v/v). The isocratic elution was 50% of mobile phase A. The dual electrospray ionization (ESI) source was operated in positive modes. The ESI condition was as follows: drying gas (gas N<sub>2</sub>) temperature, 350 °C; gas flow rate, 10 L/min; nebulizer pressure, 30 psig; mass range, 200–800m/z; scan rate, 4 spectra/s; capillary voltage, 3500 V; skimmer voltage, 65 V; octapole RFV, 750 V; and fragment voltage, 50 V.

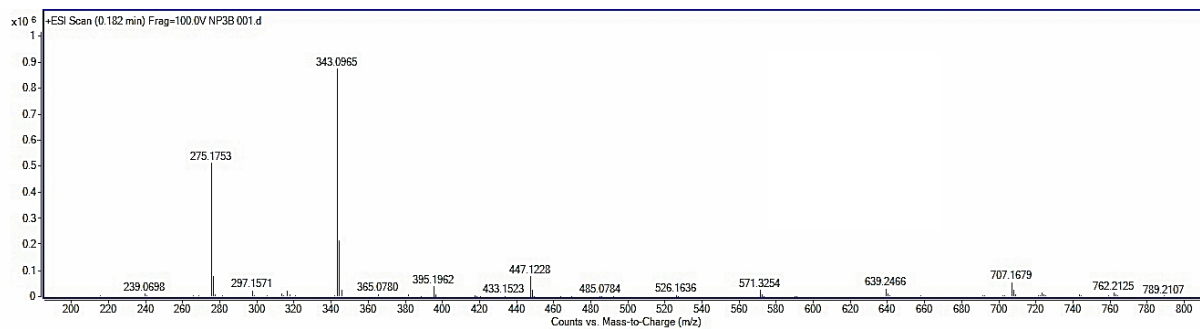

**Figure S25** Mass spectrum (MS-ESI) of compound **2a**

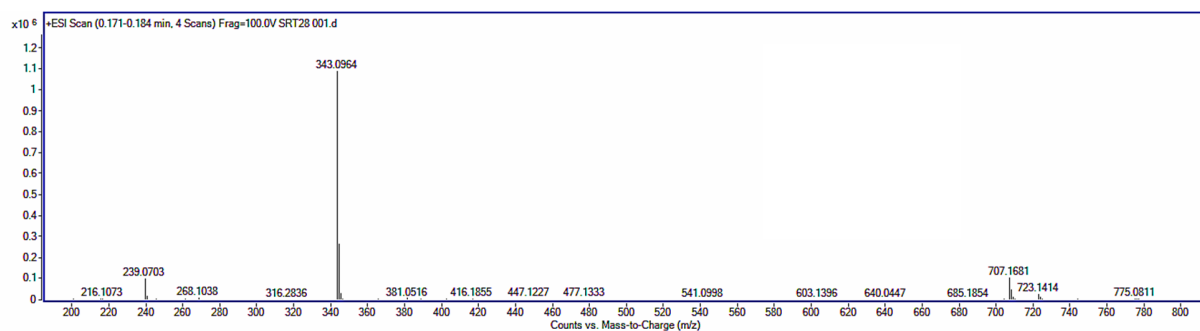

**Figure S26** Mass spectrum (MS-ESI) of compound **2b**

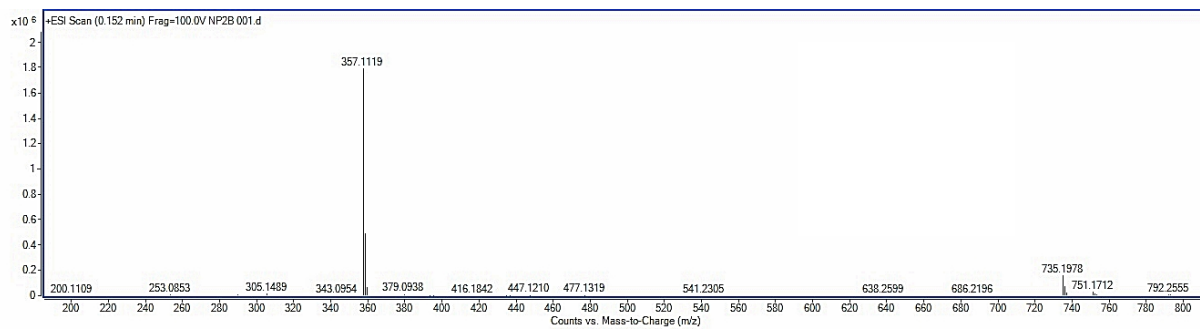

**Figure S27** Mass spectrum (MS-ESI) of compound **2c**

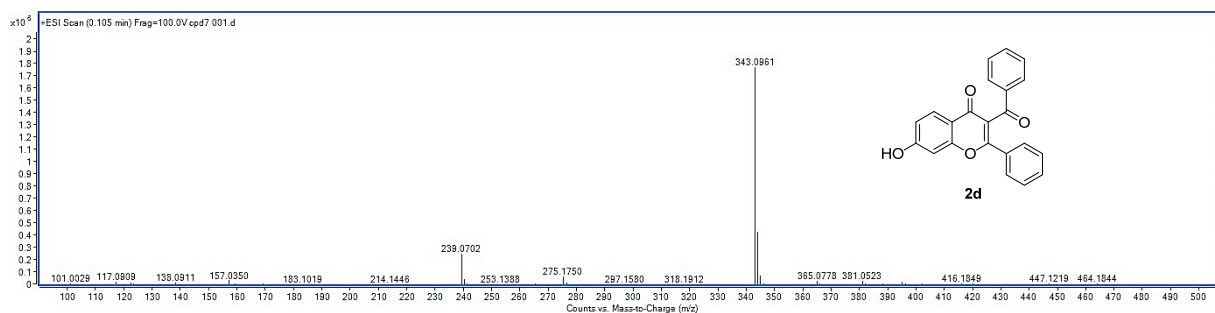

**Figure S28** Mass spectrum (MS-ESI) of compound **2d**

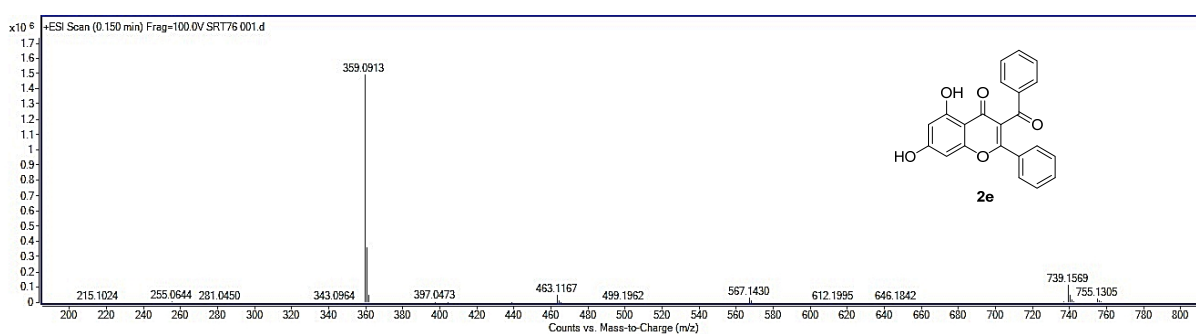

**Figure S29** Mass spectrum (MS-ESI) of compound **2e**

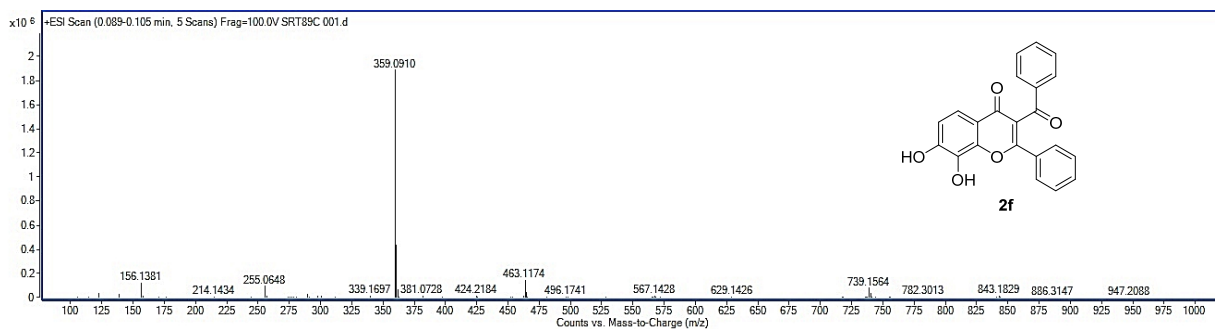

**Figure S30** Mass spectrum (MS-ESI) of compound **2f**

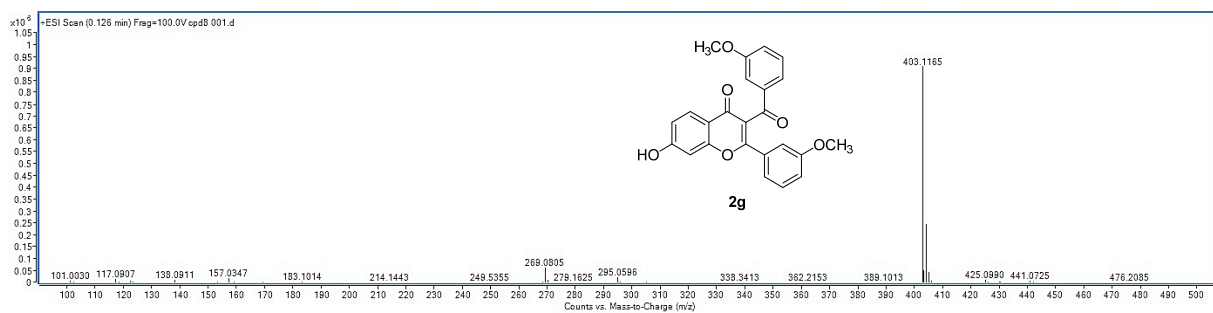

**Figure S31** Mass spectrum (MS-ESI) of compound **2g**

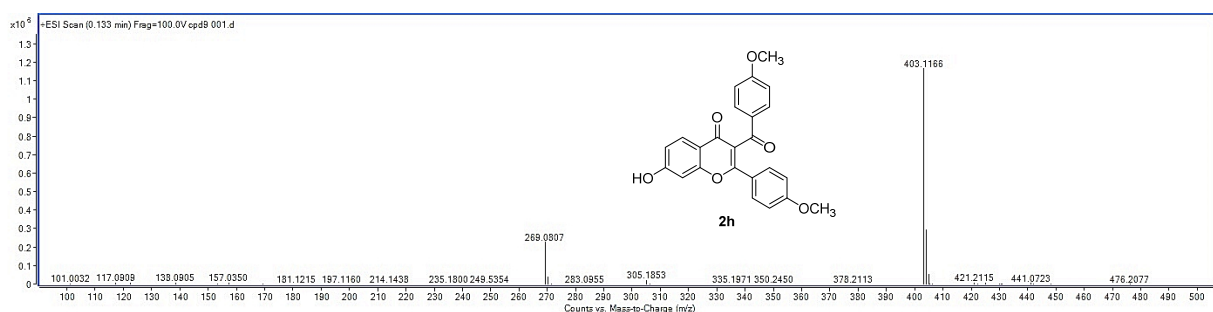

**Figure S32** Mass spectrum (MS-ESI) of compound **2h**

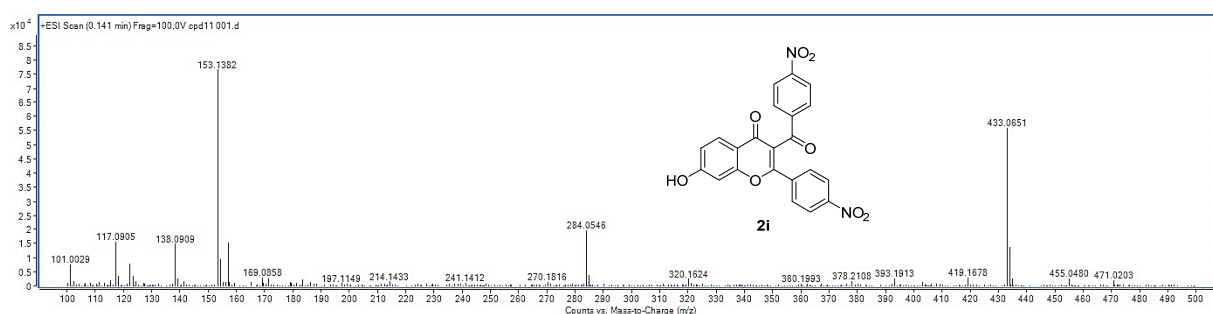

**Figure S33** Mass spectrum (MS-ESI) of compound **2i**

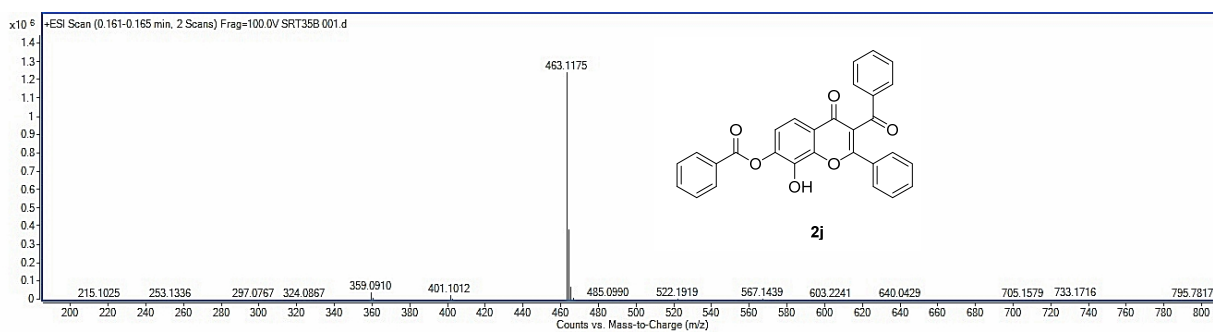

**Figure S34** Mass spectrum (MS-ESI) of compound **2j**

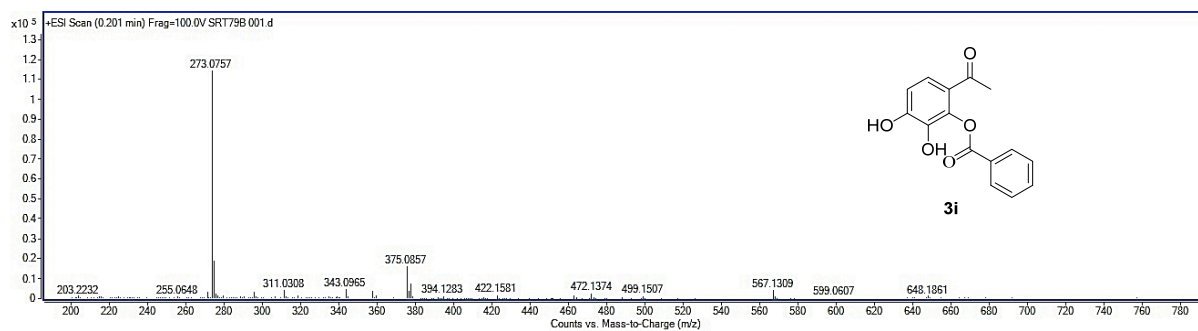

**Figure S35** Mass spectrum (MS-ESI) of compound **3i**

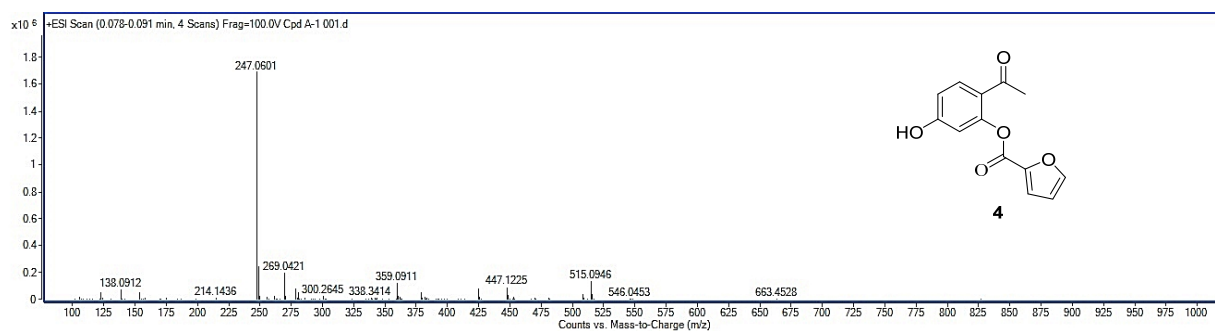

**Figure S36** Mass spectrum (MS-ESI) of compound **4**
